# 1 Causal evidence for the adaptive benefits of social foraging in the wild

2 Lysanne Snijders<sup>1,2\*</sup>, Stefan Krause<sup>3</sup>, Alan N. Tump<sup>4</sup>, Michael Breuker<sup>3</sup>, Chente Ortiz<sup>5</sup>, Sofia Rizzi<sup>5</sup>, Indar  
3 W. Ramnarine<sup>6</sup>, Jens Krause<sup>1,5</sup>, Ralf H.J.M. Kurvers<sup>1,4</sup>

4

5 <sup>1</sup> Department of Biology and Ecology of Fishes, Leibniz Institute of Freshwater Ecology and Inland  
6 Fisheries, Berlin, Germany

7 <sup>2</sup> Behavioural Ecology Group, Wageningen University, Wageningen, The Netherlands

8 <sup>3</sup> Department of Electrical Engineering and Computer Science, Lübeck University of Applied Sciences,  
9 Lübeck, Germany

10 <sup>4</sup> Center for Adaptive Rationality, Max Planck Institute for Human Development, Berlin, Germany

11 <sup>5</sup> Faculty of Life Sciences, Humboldt Universität zu Berlin, Berlin, Germany

12 <sup>6</sup> Department of Life Sciences, University of the West Indies, St Augustine, Trinidad and Tobago

13 *\*Corresponding author*

14

## 15 Abstract

16 Sociality is a fundamental organizing principle across taxa, thought to come with a suite of adaptive  
17 benefits. However, making causal inferences about these adaptive benefits requires experimental  
18 manipulation of the social environment, which is rarely feasible in the field. Here we manipulated the  
19 number of conspecifics in Trinidadian guppies (*Poecilia reticulata*) in the wild, and quantified how this  
20 affected a key benefit of sociality, social foraging, by investigating several components of foraging success.  
21 As adaptive benefits of social foraging may differ between sexes, we studied males and females separately,  
22 expecting females, the more social and risk-averse sex, to benefit more from conspecifics than males.  
23 Conducting over 1,600 foraging trials, we found that in both sexes, increasing the number of conspecifics  
24 led to faster detection of novel food patches and a higher probability of feeding following detection of the  
25 patch, resulting in greater individual resource consumption. The slope of the latter relationship differed  
26 between the sexes, with males unexpectedly exhibiting a stronger social benefit. Our study provides rare  
27 causal evidence for the adaptive benefits of social foraging in the wild, and highlights that sex differences  
28 in sociality do not necessarily imply an unequal ability to profit from the presence of others.

29

30 **Keywords** group size, *Poecilia reticulata*, social evolution, social facilitation, social foraging, social

31 information use

## 32 1. Introduction

33 Sociality evolved convergently in a wide range of taxa wherever its benefits (e.g. reduced predation risk  
34 and increased foraging success) outweighed its costs (e.g. increased conspicuousness and competition)  
35 [1,2]. This cost–benefit ratio of sociality is more variable in some animal populations than others, leading  
36 to a variety of social systems, from facultative social populations with a high degree of fission–fusion to  
37 obligate social populations with little fission–fusion [3]. Their socially plastic nature makes facultative  
38 social populations highly suitable study systems for investigating the costs and benefits of sociality—for  
39 example, by correlating natural variation in group size to variation in group performance [4], while  
40 including the performance of solitary individuals. However, studies examining natural variation in group  
41 size, although highly informative [5–8], do not allow causal conclusions to be drawn on the costs and  
42 benefits of sociality for individuals. Experimental studies have been designed to fill this gap by directly  
43 manipulating the social environment. As these studies have been conducted primarily in captive settings  
44 [9–13], however, they are unable to account for any unidentified local environmental pressures that  
45 shaped selection for sociality.

46 Experimental studies that manipulate the number of conspecifics in the wild are few and far between.  
47 Such studies are vital for drawing ecologically and evolutionary relevant conclusions on the costs and  
48 benefits of social life. One key benefit of sociality is the opportunity for social foraging [14]. Although the  
49 exact benefits of the presence of conspecifics vary with ecological conditions [15,16] (e.g. food abundance  
50 [17]), the presence of conspecifics is generally thought to increase the mean (or reduce the variance in)  
51 individual foraging performance [14,18]. Due to the challenges of setting up, and subsequently replicating,  
52 different social compositions in the field, few studies have been able to experimentally manipulate the  
53 social environment in vertebrate species and study its effects on foraging performance in the wild [19–21].  
54 Fewer, if any, have been able to manipulate conspecific number, including representative solitary  
55 conditions.

56 Whether and how much an individual gains from the presence of conspecifics during foraging  
57 depends on individual- and group-level traits that modulate the effectiveness of the underlying social  
58 foraging mechanisms. Mechanisms that may underlie positive effects of sociality on individual foraging  
59 performance include local and stimulus enhancement [22], decreased neophobia [13], social facilitation

60 [23], social and public information use [24], perceived safety (leading to e.g. a reduction in anti-predation  
61 behavior in favor of foraging [11]), perceived competition (leading to e.g. an increase in foraging effort to  
62 increase one's resource share [12]), pool of competence [7] and cooperation [5]. Mechanisms that may  
63 underlie negative effects of sociality include social attraction away from a profitable resource [25],  
64 misleading social information [26], increased interference [27] and exclusion from the resource [28].  
65 Identifying the exact mechanisms underlying social effects is challenging, especially in the wild. However,  
66 by studying how the number of conspecifics changes different components of foraging performance (e.g.  
67 resource detection and resource acquisition), and whether particular individual traits modulate these  
68 changes, we can gain more insight not only into whether social foraging has benefits, but also into the  
69 mechanisms underlying these benefits.

70 Sex is likely to be one of the prime individual-level traits influencing the potential benefit(s) of social  
71 foraging. Many individual-level characteristics that are predicted to modulate the effectiveness of social  
72 foraging mechanisms, such as social position [29], risk-sensitivity [30], energy requirement [31] and  
73 dominance [32], covary with sex [17,30,33–38]. We may thus expect conspecific presence to have a  
74 stronger impact on foraging performance in one sex than the other [39,40].

75 Here, we conducted an in situ manipulation of the number of same-sex conspecifics in a facultative  
76 social vertebrate species, wild-living Trinidadian guppies (*Poecilia reticulata*). We varied the number of fish  
77 from one to eight males or females per pool. Subsequently, we conducted food-provisioning experiments  
78 and quantified different components of individual foraging performance, including (latency to) resource  
79 detection, likelihood of feeding following detection (i.e. resource acquisition) and total number of bites. In  
80 our earlier work with wild Trinidadian guppies living upstream in resource-poor environments, we  
81 revealed that more social individuals located more novel food patches [21,41], suggesting that sociality  
82 plays a relevant role in resource detection in this population. Due to the lack of predators [42] and the  
83 infrequent use of aggression [21] in our population, we did not expect a strong increase or decrease in  
84 resource acquisition with conspecific number. Previous work showed that male guppies are generally less  
85 social [21,43–47] and more risk-taking than females [43,48–50]. We therefore predicted a shallower  
86 increase in foraging performance, in terms of both resource detection and acquisition, with increasing  
87 number of conspecifics for males than for females. Moreover, given females' higher nutritional demands,

88 we expected females to have a higher foraging performance overall than males. Finally, to evaluate  
89 whether the expected shallower increase in males' foraging performance could be explained by males  
90 generally taking less advantage of the presence of others, rather than by male conspecifics providing less  
91 effective social cues to other males, we also tested compositions of one focal male with up to seven female  
92 conspecifics.

93

## 94 **2. Material and methods**

### 95 **(a) Study system**

96 We conducted the study between 4 and 20 March 2018 in the upper rainforest region of the Turure River  
97 in the Northern Range of Trinidad & Tobago (10°41'8"N, 61°10'22"W). This site has relatively few guppy  
98 predators [42,51] and is relatively resource poor due to low sunlight exposure [52]. We used seven natural  
99 pools in which we rearranged rocks and pebbles to maintain continuous water flow while minimizing the  
100 risk of fish migration. The average surface area of these pools was 3.3 m<sup>2</sup> (range: 2.4–4.6 m<sup>2</sup>;  
101 Supplementary Table 1); the average depth, based on five measurements in each pool, was 0.16 m (range  
102 0.12–0.26 m; Supplementary Table 1). Guppies originally occurring in the pools were taken out.  
103 Experimental fish were caught from a nearby stretch of the same river and were, upon capture, sexed (194  
104 females, 143 males), sized (females: Mean ± SD = 24.6 ± 3.7 mm, males: Mean ± SD = 21.6 ± 1.6 mm)  
105 and individually marked using Visible Implant Elastomer (VIE) tags (©Northwest Marine Technology  
106 Inc.) [21,46,53].

107

### 108 **(b) Experimental treatments**

109 We assigned subjects to single-sex batches of one, four or eight fish (main treatments) or to a mixed-sex  
110 batch of one male and seven females (control treatment). Due to fish escaping (~14% of 391 assigned  
111 individuals; no sex bias:  $\chi^2 = 2.30$ ,  $P = 0.13$ ), we ultimately had a more diverse range of group sizes  
112 (females: one to eight fish; males: one, three, four, seven and eight fish; control: five to eight fish), spread  
113 over 84 batches (39 female batches, 35 male batches, 10 control batches; Supplementary Table 2). The  
114 different treatments were approximately balanced over the seven pools so that each pool received each of  
115 the seven treatments one to three times (Supplementary Table 1). Following marking, fish were placed in

116 their designated pool and left overnight to acclimate. Foraging trials took place the next day. After  
117 finishing the foraging trials, we released subjects further downstream (to avoid recapture).

118

### 119 **(c) Foraging trials**

120 Foraging trials were conducted following a protocol similar to Snijders et al. (2018, 2019). We assigned  
121 five feeding locations, roughly equidistant from one another, in each pool, to offer novel food to the  
122 guppies. To standardize the food presentations, each location was marked by an opaque plastic cylinder  
123 (diameter: 77 mm, height: 30–40 mm) floating on the surface and kept in place by two wooden skewers.  
124 Through these cylinders, we lowered a food item consisting of a small lead ball (diameter: 8 mm) covered  
125 in a mix of gelatine and fish food (TetraPro©; Spectrum Brands Inc), which was attached to a  
126 monofilament fishing line connected to a wooden rod. The fish food included carotenoids, an important  
127 dietary component for guppies [54,55]. We kept the food item (termed ‘food patch’ from here on, as  
128 several fish could feed from it simultaneously) approximately two centimeters above the bottom of the  
129 pool for two minutes, irrespective of whether and when it was discovered. After each trial, we waited for  
130 one minute before starting a new trial in a different location. Once we had completed trials for all five  
131 locations of a pool in random order, we repeated this procedure three more times, resulting in 20 trials per  
132 batch, with some exceptions due to rain, leading to 1,645 trials in total.

133

### 134 **(d) Video analyses**

135 We recorded all foraging trials with camcorders (SONY HDR-PJ530E), mounted on tripods. Two  
136 observers analyzed the recordings using BORIS v 7.5 [56], a free open-source event-logging software. The  
137 two observers analyzed different sets of trials, but both sets included all seven treatments and all seven  
138 pools. For each fish, the observer scored its presence, arrival latency and number of foraging bites. We  
139 defined a fish as present when it was within two body lengths of the food patch. To test the inter-observer  
140 reliability, we had both observers score the trials for the same set of six batches (30 unique individuals).  
141 The scores for arrival latency, total number of trials present and total number of foraging bites all  
142 correlated strongly between the two observers ( $r_s > 0.9$ ). For all trials, the food discovery latencies and  
143 presence/absence of individuals were also compared with field notes. In case of discrepancy, the video

144 was checked again and, if necessary, scores were amended by a third observer who had also been present  
145 in the field. Not all videos could be reliably analyzed (e.g. due to glare). For 1,619 (out of 1,645) trials, we  
146 could reliably quantify whether or not each batch member had been present; for 1,559 trials, we could  
147 reliably assess arrival latency and foraging bites. These trials were used for subsequent analyses.

148

#### 149 **(e) Statistical analyses**

150 To investigate whether the number of conspecifics in the pool increased individual foraging performance  
151 (e.g. via social facilitation or social information use) and whether the strength of this effect was sex-  
152 dependent, we tested the effects of fish number (number of guppies in the pool), sex-composition (sex of  
153 the guppies in the pool: all-male or all-female, excluding control batches) and their interaction on four  
154 response variables: whether an individual found a patch (yes/no), for each trial (model I); the arrival  
155 latency of an individual, for each trial (model II); whether an individual took at least one bite from a patch  
156 (yes/no), for each patch visited (as a measure of motivation to feed; model III) and, finally, the total  
157 number of foraging bites per individual across all trials (model IV).

158 We used stepwise backward model selection, assessing the significance of fixed effects by the change  
159 in deviance upon removal of the effect, using log-likelihood ratio tests. Next to the interaction and main  
160 fixed effects of fish number (integer, scaled) and sex-composition (factor), all starting models included the  
161 main effect of pool surface area (continuous, scaled) and the main effects of body length in mm (integer,  
162 scaled and centered on sex) and its interaction with sex-composition. Batch identity and pool identity were  
163 included as random effects (Supplementary Figure 1). All models—except model IV—further included  
164 the fixed effect of trial number (integer, scaled) and the random effects of individual identity (nested in  
165 batch identity) and patch location identity (nested in pool identity; Supplementary Figure 2). Model IV  
166 uniquely included the number of trials conducted as a fixed effect (integer), which was kept in the model  
167 at all times to account for the slightly varying number of trials—and thus varying foraging opportunities—  
168 between individuals. Fish number and sex-composition were kept in the models at all times, irrespective  
169 of their significance, since they were our fixed effects of interest. Interactions and fixed effects with  $P >$   
170 0.1 were removed (unless stated differently above), starting with the least significant interaction followed  
171 by the least significant main effect. Estimates are reported for the last model still including the effect. In

172 the case of a significant interaction between fish number and sex-composition, we additionally ran the  
173 respective model including only the singleton or the > 4 fish treatments in order to specifically investigate  
174 potential sex differences in solitary versus social foraging performance.

175 Model selection was conducted with R version 3.6.2 [57] in R Studio version 1.2.5033 (© 2009–2019  
176 RStudio, Inc.). Models I and III (binary dependent variable) were analyzed with generalized linear mixed  
177 models (GLMM) with a binomial error distribution and logit link function using the glmer function from  
178 the ‘lme4’ package [58], fitted by maximum likelihood (Laplace approximation) using the bobyqa  
179 optimizer. Model II (continuous dependent variable) was analyzed with mixed effects repeated measures  
180 Cox proportional hazards models using the ‘coxme’ package [59], fitted by maximum likelihood. Trials in  
181 which individuals did not arrive at the food patch were assigned a latency of 120 seconds and labelled as  
182 right-censored (i.e. ‘120+’) using the Surv function in the ‘survival’ package [60]. We evaluated the  
183 proportional hazards assumption by using the cox.zph function and graphically inspecting the survival  
184 curves. Finally, model IV (integer dependent variable), due to over-dispersion, was analyzed by running a  
185 GLMM using Template Model Builder (TMB) with a negative binomial error distribution and a log link  
186 function, using the glmmTMB function from the ‘glmmTMB’ package [61]. Individuals that were never  
187 present at any patch ( $N = 6$ ) were assigned zero bites.

188 To evaluate whether any observed sex difference in social foraging performance may have been  
189 driven by males having male foraging companions [21], rather than by males generally being poor or  
190 proficient social foragers, we compared the foraging performance of males in the company of other males  
191 to that of ‘control’ males in the company of females. We again used the statistical procedures described  
192 above, but excluding the interaction effects, female-only treatments and treatments with originally fewer  
193 than eight fish. Figures were created using the ‘ggplot2’ package [62].

194

### 195 **3. Results**

#### 196 **(a) Resource detection: presence at novel food patches**

197 A larger number of fish in a pool, independent of sex, increased the chance and speed of a novel food  
198 patch being discovered by any fish (Supplementary Results), indicating the presence of advantageous  
199 social information that individuals could exploit to improve their foraging performance. Indeed, the



200 higher the number of conspecifics in the pool, the more likely individuals were to discover a novel patch  
201 (Estimate (*Est*)  $\pm$  Standard Error (*SE*) =  $0.22 \pm 0.07$ ,  $N = 5070$ ,  $\chi^2 = 10.27$ ,  $p = 0.001$ ; Figure 1). Males  
202 and females benefited similarly from the presence of more same-sex conspecifics (Interaction effect: *Est*  $\pm$   
203 *SE* =  $0.02 \pm 0.13$ ,  $N = 5070$ ,  $\chi^2 = 0.01$ ,  $p = 0.91$ ; Figure 1) and did not differ in their overall likelihood of  
204 finding a novel patch (*Est*  $\pm$  *SE* =  $-0.11 \pm 0.14$ ,  $N = 5070$ ,  $\chi^2 = 0.61$ ,  $p = 0.43$ ; Figure 1). Body length did  
205 not affect the likelihood of novel food patch discovery (*Est*  $\pm$  *SE* =  $0.06 \pm 0.05$ ,  $N = 5070$ ,  $\chi^2 = 1.73$ ,  $p =$   
206  $0.19$ ) in either males or females (Interaction effect: *Est*  $\pm$  *SE* =  $-0.06 \pm 0.09$ ,  $N = 5070$ ,  $\chi^2 = 0.36$ ,  $p =$   
207  $0.55$ ). There was a (non-significant) tendency for the likelihood of novel food patch discovery to increase  
208 with trial number (*Est*  $\pm$  *SE* =  $0.06 \pm 0.03$ ,  $N = 5070$ ,  $\chi^2 = 2.77$ ,  $p = 0.096$ ). There was no effect of pool  
209 surface area (*Est*  $\pm$  *SE* =  $-0.02 \pm 0.13$ ,  $N = 5070$ ,  $\chi^2 = 0.02$ ,  $p = 0.88$ ).

210

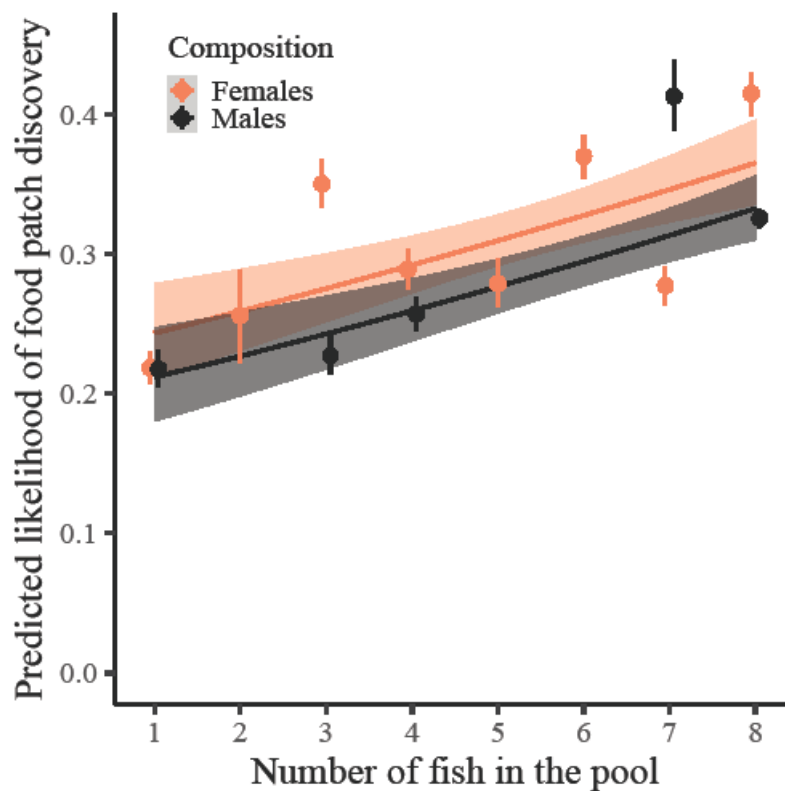

211

212 **Figure 1.** Predicted likelihood of novel food patch discovery per individual per trial as a function of the  
213 number of fish in the pool. Dots with bars represent the mean  $\pm$  95% confidence interval (*CI*) summary  
214 statistics for each sex and fish number (*CI* obtained from 1,000 bootstraps). Grouping of the data was  
215 conducted for graphical purposes only; analyses were conducted on an individual-by-trial level with the

216 number of fish in the pool as a continuous variable. Regression lines show the predicted final model  
217 values. Shaded areas around the lines reflect 95% *CI*. A slight horizontal position dodge was added to  
218 reduce overlap.

219

## 220 **(b) Resource detection: arrival latency at novel food patches**

221 Individuals with more conspecifics in the pool were also quicker to reach a novel food patch (*Hazard ratio*  
222 (95% Confidence Interval (*CI*)) = 1.17 (1.06–1.30),  $N_{\text{not censored}}/N_{\text{total}} = 1423/4841$ ,  $\chi^2 = 9.78$ ,  $p = 0.002$ ;  
223 Figure 2) and this positive social effect was, again, similar for males and females (Interaction effect: *Hazard*  
224 *ratio* (*CI*) = 1.06 (0.87–1.30),  $N = 1423/4841$ ,  $\chi^2 = 0.36$ ,  $p = 0.55$ ; Figure 2). Males and females did not  
225 differ in how quickly they reached a novel food patch (*Hazard ratio* (*CI*) = 0.88 (0.70–1.09),  $N =$   
226  $1423/4841$ ,  $\chi^2 = 1.43$ ,  $p = 0.23$ ; Figure 2). Body length did not affect the speed of reaching a novel food  
227 patch (*Hazard ratio* (*CI*) = 1.04 (0.97–1.12),  $N = 1423/4841$ ,  $\chi^2 = 1.25$ ,  $p = 0.26$ ) in either males or females  
228 (Interaction effect: *Hazard ratio* (*CI*) = 0.91 (0.79–1.05),  $N = 1423/4841$ ,  $\chi^2 = 1.60$ ,  $p = 0.21$ ). Trial  
229 number did not affect how quickly an individual reached a novel food patch (*Hazard ratio* (*CI*) = 1.04  
230 (0.99–1.10),  $N = 1423/4841$ ,  $\chi^2 = 2.43$ ,  $p = 0.12$ ), neither did pool surface area (*Hazard ratio* (*CI*) = 0.94  
231 (0.76–1.16),  $N = 1423/4841$ ,  $\chi^2 = 0.36$ ,  $p = 0.55$ ). When looking at recruitment latency (defined as the  
232 time between the arrival of the first and second fish), we found no difference between males and females  
233 (Supplementary Results).

234

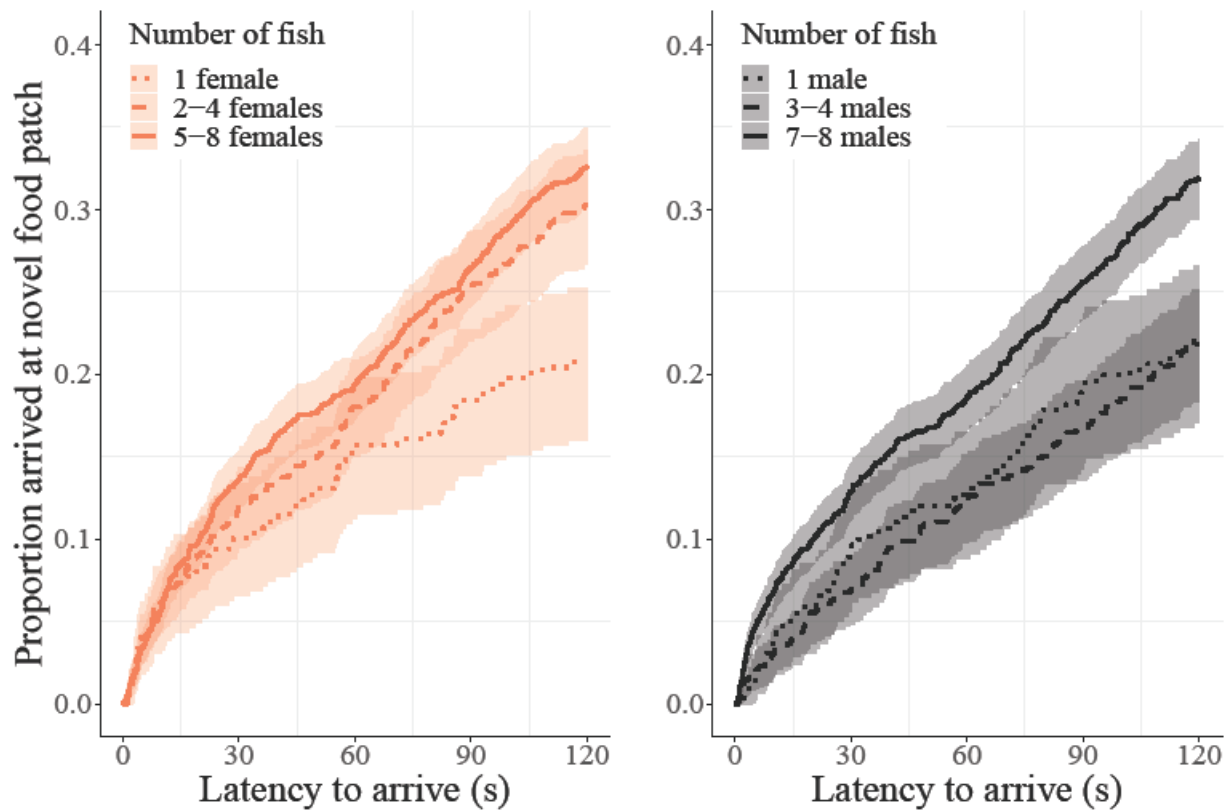

235

236 **Figure 2.** Proportion of observations in which female and male individuals arrived at the novel food  
237 patch as a function of seconds since the start of the trial. Higher values on the y-axis reflect an increasing  
238 number of individuals arriving at a food patch by that time. Grouping of the number of fish in the pool  
239 was conducted for graphical purposes only; analyses were conducted with fish number as a continuous  
240 covariate. Regression lines show the predicted values of a simplified model (excluding additional co-  
241 variates and random effects). Shaded areas around the lines reflect 95% confidence intervals.

242

### 243 (c) Resource acquisition: motivation to feed from novel food patches

244 Individuals with more conspecifics in the pool were more likely to take a bite while present at a food  
245 patch, and this positive effect of conspecifics on the motivation to feed was stronger for males than for  
246 females (Interaction effect:  $Est \pm SE = 1.95 \pm 0.48$ ,  $N = 1423$ ,  $\chi^2 = 16.73$ ,  $p < 0.001$ ; Figure 3). Males  
247 were less likely than females to take a bite when they were solitary ( $Est \pm SE = -3.91 \pm 1.44$ ,  $N = 126$ ,  $\chi^2$   
248  $= 13.06$ ,  $p < 0.001$ ) but tended to be more likely than females to feed when they were with more than five  
249 fish in the pool ( $Est \pm SE = 1.68 \pm 0.92$ ,  $N = 966$ ,  $\chi^2 = 3.19$ ,  $p = 0.074$ ; Figure 3). Body length influenced  
250 whether an individual would feed, with a negative effect in males and a positive effect in females

251 (Interaction effect:  $Est \pm SE = 1.95 \pm 0.48$ ,  $N = 1423$ ,  $\chi^2 = 10.49$ ,  $p = 0.001$ ; Supplementary Figure 3).  
252 There was no effect of trial number on the likelihood of an individual taking a bite at a food patch ( $Est \pm$   
253  $SE = 0.06 \pm 0.09$ ,  $N = 1423$ ,  $\chi^2 = 0.45$ ,  $p = 0.50$ ), nor was there an effect of pool surface area ( $Est \pm SE$   
254  $= -0.09 \pm 0.46$ ,  $N = 1423$ ,  $\chi^2 = 0.04$ ,  $p = 0.84$ ).

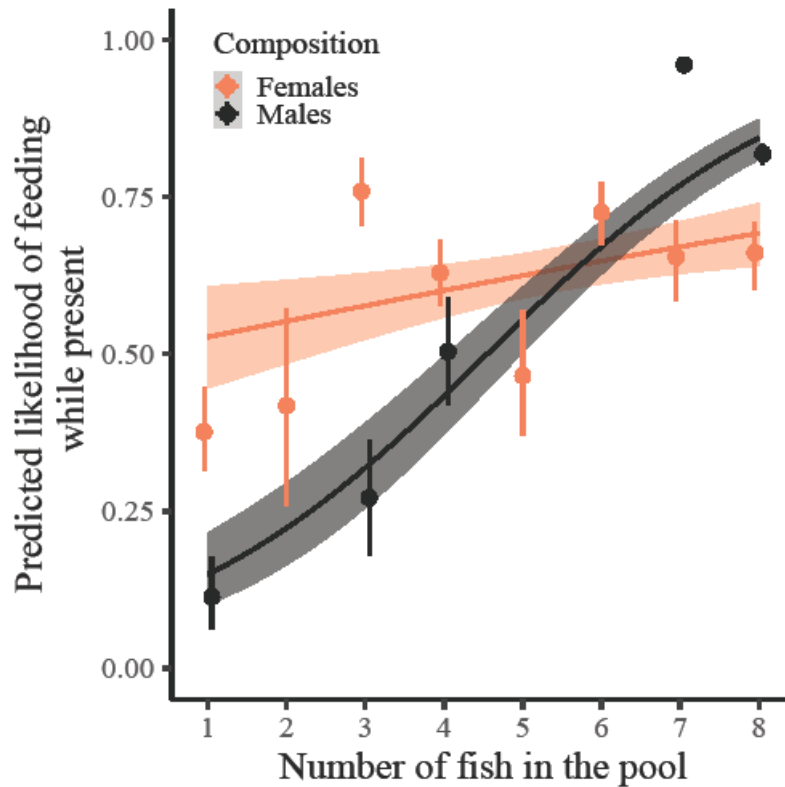

255  
256 **Figure 3.** Predicted probability of an individual feeding when at a food patch as a function of the number  
257 of fish in the pool. Dots with bars represent the mean  $\pm$  95% confidence interval (CI) summary statistics  
258 for each sex and fish number (CI obtained from 1,000 bootstraps). Grouping of the data was conducted  
259 for graphical purposes only; analyses were conducted on an individual-by-trial level with the number of  
260 fish in the pool as a continuous variable. Regression lines show the predicted final model values. Shaded  
261 areas around the lines reflect 95% CI. A slight horizontal position dodge was added to reduce overlap.

262

#### 263 (d) Resource consumption: total number of bites

264 Individuals with more conspecifics in the pool took more bites, with males showing a stronger increase  
265 with the number of conspecifics than females (Interaction effect:  $Est \pm SE = 1.07 \pm 0.29$ ,  $N = 265$ ,  $\chi^2 =$   
266  $13.35$ ,  $p < 0.001$ ; Figure 4). Single males took fewer bites than single females ( $Est \pm SE = -3.11 \pm 1.18$ ,  $N$

267 = 31,  $\chi^2 = 12.21$ ,  $p = 0.001$ ; Figure 4), but males and females in a pool with at least four other conspecifics  
268 did not differ ( $Est \pm SE = 0.48 \pm 0.47$ ,  $N = 168$ ,  $\chi^2 = 1.00$ ,  $p = 0.32$ ; Figure 4). The number of bites  
269 decreased with body length in males, but increased with body length in females (Interaction effect:  $Est \pm$   
270  $SE = -0.29 \pm 0.14$ ,  $N = 265$ ,  $\chi^2 = 4.32$ ,  $p = 0.04$ ; Supplementary Figure 4). Pool surface area had no  
271 effect on the total number of bites per individual ( $Est \pm SE = -0.02 \pm 0.24$ ,  $N = 265$ ,  $\chi^2 = 0.01$ ,  $p = 0.93$ ).  
272

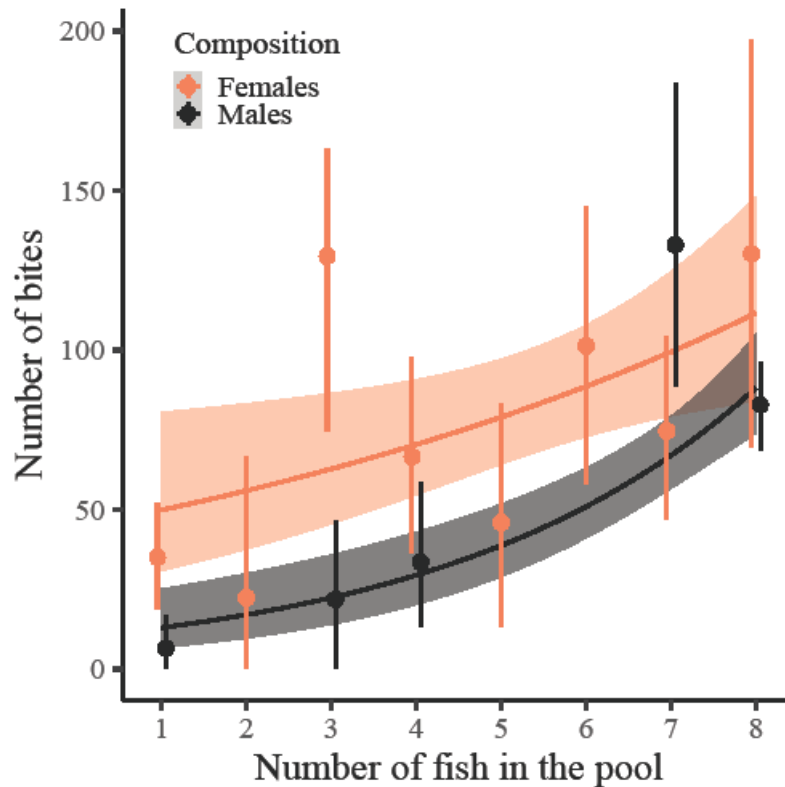

273  
274 **Figure 4.** Number of bites per individual as a function of the number of fish in the pool. Dots with bars  
275 represent the mean  $\pm$  95% confidence interval (*CI*) summary statistics for each sex and fish number (*CI*  
276 obtained from 1,000 bootstraps). Grouping of the data was conducted for graphical purposes only;  
277 analyses were conducted on the level of individuals with the number of fish in the pool as a continuous  
278 variable. Regression lines show the predicted final model values. Shaded areas around the lines reflect 95%  
279 *CI*. A slight horizontal position dodge was added to reduce overlap.

280

281 **(e) Foraging performance of males in the presence of females**

282 Consistent with our previous studies [21,41], there was a tendency for males with male conspecifics in the  
283 pool to be less likely to reach a novel food patch than males with female conspecifics (i.e. control males)  
284 ( $Est \pm SE = -0.60 \pm 0.35$ ,  $N = 1828$ ,  $\chi^2 = 2.79$ ,  $p = 0.09$ ; Supplementary Figure 5). However, sex of the  
285 conspecifics in the pool did not affect how quickly males reached a novel patch (*Hazard ratio (CI)* = 0.67  
286 (0.40–1.13),  $N = 572/1713$ ,  $\chi^2 = 2.20$ ,  $p = 0.14$ ; Supplementary Figure 6). Males with male conspecifics in  
287 the pool were, in contrast, more likely to bite when present at a food patch than males with female  
288 conspecifics ( $Est \pm SE = 2.32 \pm 0.97$ ,  $N = 572$ ,  $\chi^2 = 5.02$ ,  $p = 0.02$ ; Supplementary Figure 7), resulting in  
289 a tendency for these males to also gain more bites in total ( $Est \pm SE = 0.78 \pm 0.44$ ,  $N = 97$ ,  $\chi^2 = 3.24$ ,  $p =$   
290 0.07; Supplementary Figure 8).

291

#### 292 4. Discussion

293 The costs and benefits of social living are a central research topic in ecology and evolution, yet few studies  
294 have been able to manipulate key modulators of this cost–benefit trade-off in the field. The present  
295 manipulation of conspecific presence in a facultatively social fish population provides causal evidence for  
296 an increase in resource detection (faster, more frequent), resource acquisition (more likely to feed) and  
297 total resource consumption (more bites) with the number of conspecifics for both male and female  
298 guppies in the wild.

299 In many vertebrate species, there are strong sex differences in social tendencies and social interest  
300 [e.g. 30,33,34,37,38,63] that may be present from an early age [64]. Male guppies spend less time near  
301 same-sex conspecifics [21], are more likely to leave shoals [45] and are less likely to form stable  
302 cooperative bonds [44,47] than their female conspecifics. Our finding that males derived equal, if not  
303 greater, benefit than females from social foraging demonstrates that social foraging mechanisms are not  
304 necessarily less effective in classes of less social individuals (but see [39]), possibly because some of these  
305 social mechanisms are not an adaptation to social life per se [65]. Indeed, even non-social species, such as  
306 the solitary-living red-footed tortoise (*Geochelone carbonaria*), are capable of using social cues to their  
307 advantage [66]. Comparisons between grouping and non-grouping fish species have also found no  
308 differences in social information use [67]. We built upon these previous findings by showing that, also

309 within species, classes of less social individuals can use such social mechanisms equally well and, most  
310 importantly, that they use this capability to gain an advantage in a fitness-determining context in the wild.

311 We had expected females to show a stronger foraging performance overall, both in solitary and social  
312 conditions, being selected as such following the strong link between fecundity and resource availability in  
313 females [68–70], and given our earlier findings [21]. However, although females outperformed males in the  
314 solitary condition, males reached comparable levels of total resource consumption when at least six other  
315 same-sex conspecifics were present. Interference competition at the patch [27] may have partly  
316 constrained females to outperform males in highly social conditions. We can only speculate as to which  
317 mechanism(s) generated the strong positive social effect in males, but given that the increase in the  
318 number of bites appears to be driven mostly by an increase in the probability of feeding when present,  
319 mechanisms such as local enhancement [22], pool of competence [7] and cooperation [5] can be excluded.  
320 Perceived competition, which is predicted to increase feeding rate [12], is also an unlikely explanation as  
321 we would not expect it to change the motivation of fish that are not feeding at all. Perceived safety is also  
322 unlikely as a mechanism [11], as we would then have expected females (the risk-averse sex [43,48–50]) to  
323 show the strongest improvement in social versus asocial conditions. Alternatively, solitary males may have  
324 underperformed in resource acquisition because they were (also) looking for females, while males in the  
325 social condition may have used the presence of other males as an indicator that females should already be  
326 present [71]. Males in the company of several other foraging males may have been more motivated to  
327 linger and feed, making social facilitation [23,72] a likely mechanism of the observed increase in total  
328 resource consumption. This explanation is also in line with the socio-ecological theory that predicts that  
329 female distribution is governed primarily by the distribution of resources and risk, whereas male  
330 distribution is governed primarily by the (assumed) distribution of females [70,73,74].

331 To maximize their fitness, male animals have to ensure survival via sufficient resource consumption,  
332 while at the same time being prolific reproducers. Given that female presence is strongly linked to the  
333 presence of resources [70,73,74], males frequently have to choose between courting and foraging. An  
334 earlier study suggests that male Trinidadian guppies make state-dependent trade-offs in such situations,  
335 ensuring first that they have sufficient energy reserves, but then making a noticeable switch to courtship  
336 [75]. Indeed, although males tended to reach more novel food patches when in the presence of females,

337 consistent with our previous findings [21,41], they were less likely to feed than males in single-sex  
338 compositions, possibly because they were pursuing mating opportunities. Our results thus highlight the  
339 relevance not only of conspecific number, but also of sex-composition, for shaping individual foraging  
340 performance in the wild. Future studies could experimentally lower the energy reserves of individual males  
341 and examine whether the motivation to feed in mixed compositions approaches the level of that of males  
342 in single-sex compositions, so as to test whether the influence of composition on individual foraging  
343 performance is indeed mainly state-dependent.

344 The natural local environment that individuals inhabit modulates the cost–benefit ratio of sociality.  
345 Conducting experiments within the natural local environment of the study population, keeping natural  
346 selection pressures mostly intact, ensures that the findings will be maximally ecologically relevant. For  
347 example, when local food resources are limited, associating in larger shoals may speed up resource  
348 detection [76], which is especially beneficial in environments in which solitary detection of food resources  
349 is time consuming [77]. This benefit of sociality may be strengthened or outweighed by effects of local  
350 predation pressure, with increasing group size leading to less (e.g. “many-eyes” theory, dilution or  
351 confusion effect) or more (e.g. increased conspicuousness) individual-level predation risk [78–80]. Taking  
352 a comparative approach and conducting this experiment across populations inhabiting different  
353 environments [e.g. 50] would be an intriguing next step to identify the ecological preconditions that allow  
354 individuals to benefit from foraging socially—and hence make socially mediated foraging success a  
355 relevant contributor to the promotion of sociality.

356 In conclusion, we experimentally demonstrated the positive effect of conspecific presence on  
357 individual foraging performance in the wild. Moreover, by showing that both sexes were able to reach  
358 similar foraging performance levels when in the presence of others, we increased our understanding of the  
359 individual traits that may shape the evolution of sociality through effects on individual social foraging  
360 performance. Investigations into the individual states and ecological characteristics that modulate the  
361 individual costs and benefits of sociality in the wild offer fruitful avenues for future research.

362

363 **Ethics.** Subject were released on the day of the trials. We performed all research in accordance with the  
364 ‘Basic Principles Governing the Use of Live Animals and Endangered Species in Research at the



365 University of the West Indies' as part of the 'Policy and Procedures on Research Ethics' of the University  
366 of the West Indies Committee on Research Ethics.

367 **Data accessibility.** Data will be made available on Dryad or GitHub.

368 **Authors' contributions.** L.S., R.H.J.M., S.K. and J.K. designed the study. L.S., R.H.J.M., S.K., A.N.T,  
369 M.B. and J.K. collected data, C.O. and S.R. extracted data from the videos, L.S. analysed the data; L.S.,  
370 I.W.R., R.H.J.M.K. and J.K. contributed materials and infrastructure to the study; L.S. wrote the first draft  
371 of the manuscript; and all authors provided feedback to revisions.

372 **Conflict of interests.** We declare we have no competing interests.

373 **Funding.** The work was funded by an IGB Postdoc Fellowship (2017–2018) and a NWO-Veni  
374 Fellowship (2020–current; VI.Veni.192.018) to L.S.

375 **Acknowledgements.** We are very grateful to Sergio Garcia for helping us with the data collection and we  
376 are thankful to Susannah Goss for helpful comments on an earlier version of the manuscript.

377

## 378 References

- 379 1. Krause J, Ruxton GD. 2002 *Living in groups*. Oxford, UK: Oxford University Press.
- 380 2. Alexander RD. 1974 The evolution of social behavior. *Annu. Rev. Ecol. Syst.* **5**, 325–383.  
381 (doi:10.1146/annurev.es.05.110174.001545)
- 382 3. Aureli F *et al.* 2008 Fission-fusion dynamics: New research frameworks. *Curr. Anthropol.* **49**, 627–654.  
383 (doi:10.1086/586708)
- 384 4. Cantor M, Aplin LM, Farine DR. 2020 A primer on the relationship between group size and group  
385 performance. *Anim. Behav.* **166**, 139–146. (doi:10.1016/j.anbehav.2020.06.017)
- 386 5. MacNulty DR, Tallian A, Stahler DR, Smith DW. 2014 Influence of group size on the success of  
387 wolves hunting bison. *PLOS ONE* **9**, e112884. (doi:10.1371/journal.pone.0112884)
- 388 6. Ashton BJ, Thornton A, Ridley AR. 2019 Larger group sizes facilitate the emergence and spread of  
389 innovations in a group-living bird. *Anim. Behav.* **158**, 1–7. (doi:10.1016/j.anbehav.2019.10.004)
- 390 7. Morand-Ferron J, Quinn JL. 2011 Larger groups of passerines are more efficient problem solvers in  
391 the wild. *Proc. Natl. Acad. Sci.* **108**, 15898–15903. (doi:10.1073/pnas.1111560108)
- 392 8. Treherne JE, Foster WA. 1980 The effects of group size on predator avoidance in a marine insect.  
393 *Anim. Behav.* **28**, 1119–1122. (doi:10.1016/S0003-3472(80)80100-X)
- 394 9. Grand TC, Dill LM. 1999 The effect of group size on the foraging behaviour of juvenile coho  
395 salmon: reduction of predation risk or increased competition? *Anim. Behav.* **58**, 443–451.  
396 (doi:10.1006/anbe.1999.1174)
- 397 10. Liker A, Bokony V. 2009 Larger groups are more successful in innovative problem solving in house  
398 sparrows. *Proc. Natl. Acad. Sci.* **106**, 7893–7898. (doi:10.1073/pnas.0900042106)
- 399 11. Blumstein DT, Evans CS, Daniel JC. 1999 An experimental study of behavioural group size effects in  
400 tammar wallabies, *Macropus eugenii*. *Anim. Behav.* **58**, 351–360. (doi:10.1006/anbe.1999.1156)
- 401 12. Rieucau G, Giraldeau L-A. 2009 Group size effect caused by food competition in nutmeg mannikins  
402 (*Lonchura punctulata*). *Behav. Ecol.* **20**, 421–425. (doi:10.1093/beheco/arn144)
- 403 13. Stöwe M, Bugnyar T, Heinrich B, Kotrschal K. 2006 Effects of group size on approach to novel  
404 objects in ravens (*Corvus corax*). *Ethology* **112**, 1079–1088. (doi:10.1111/j.1439-0310.2006.01273.x)
- 405 14. Giraldeau LA, Caraco T. 2000 *Social foraging theory*. Princeton, New Jersey, USA: Princeton University  
406 Press.
- 407 17. Ellis S, Franks DW, Natrass S, Cant MA, Weiss MN, Giles D, Balcomb KC, Croft DP. 2017  
408 Mortality risk and social network position in resident killer whales: sex differences and the importance  
409 of resource abundance. *Proc R Soc B* **284**, 20171313. (doi:10.1098/rspb.2017.1313)
- 410 18. Caraco T. 1981 Risk-sensitivity and foraging groups. *Ecology* **62**, 527–531. (doi:10.2307/1937716)
- 411 19. Firth JA, Voelkl B, Farine DR, Sheldon BC. 2015 Experimental evidence that social relationships  
412 determine individual foraging behavior. *Curr. Biol.* **25**, 3138–3143. (doi:10.1016/j.cub.2015.09.075)
- 413 20. Magurran AE, Seghers BH. 1994 A cost of sexual harassment in the guppy, *Poecilia reticulata*. *Proc. R.*  
414 *Soc. B* **258**, 89–92. (doi:10.1098/rspb.1994.0147)

- 415 21. Snijders L, Kurvers RHJM, Krause S, Tump AN, Ramnarine IW, Krause J. 2019 Females facilitate  
416 male food patch discovery in a wild fish population. *J. Anim. Ecol.* **88**, 1950–1960. (doi:10.1111/1365-  
417 2656.13086)
- 418 22. Avarguès-Weber A, Chittka L. 2014 Local enhancement or stimulus enhancement? Bumblebee social  
419 learning results in a specific pattern of flower preference. *Anim. Behav.* **97**, 185–191.  
420 (doi:10.1016/j.anbehav.2014.09.020)
- 421 23. Dindo M, Whiten A, Waal FBM de. 2009 Social facilitation of exploratory foraging behavior in  
422 capuchin monkeys (*Cebus apella*). *Am. J. Primatol.* **71**, 419–426. (doi:10.1002/ajp.20669)
- 423 24. Webster MM, Laland KN. 2012 Social information, conformity and the opportunity costs paid by  
424 foraging fish. *Behav. Ecol. Sociobiol.* **66**, 797–809. (doi:10.1007/s00265-012-1328-1)
- 425 25. Trompf L, Brown C. 2014 Personality affects learning and trade-offs between private and social  
426 information in guppies, *Poecilia reticulata*. *Anim. Behav.* **88**, 99–106. (doi:10.1016/j.anbehav.2013.11.022)
- 427 26. Rieucau G, Giraldeau L-A. 2009 Persuasive companions can be wrong: the use of misleading social  
428 information in nutmeg mannikins. *Behav. Ecol.* **20**, 1217–1222. (doi:10.1093/beheco/arp121)
- 429 27. Focardi S, Pecchioli E. 2005 Social cohesion and foraging decrease with group size in fallow deer  
430 (*Dama dama*). *Behav. Ecol. Sociobiol.* **59**, 84–91. (doi:10.1007/s00265-005-0012-0)
- 431 28. Smith JE, Kolowski JM, Graham KE, Dawes SE, Holekamp KE. 2008 Social and ecological  
432 determinants of fission–fusion dynamics in the spotted hyaena. *Anim. Behav.* **76**, 619–636.  
433 (doi:10.1016/j.anbehav.2008.05.001)
- 434 29. Aplin LM, Farine DR, Morand-Ferron J, Sheldon BC. 2012 Social networks predict patch discovery  
435 in a wild population of songbirds. *Proc. R. Soc. B* **279**, 4199–4205. (doi:10.1098/rspb.2012.1591)
- 436 30. Webster MM, Laland KN. 2011 Reproductive state affects reliance on public information in  
437 sticklebacks. *Proc. R. Soc. B* **278**, 619–627. (doi:10.1098/rspb.2010.1562)
- 438 31. Rands SA, Pettifor RA, Rowcliffe JM, Cowlshaw G. 2004 State–dependent foraging rules for social  
439 animals in selfish herds. *Proc. R. Soc. B* **271**, 2613–2620. (doi:10.1098/rspb.2004.2906)
- 440 32. Lee AEG, Cowlshaw G. 2017 Switching spatial scale reveals dominance-dependent social foraging  
441 tactics in a wild primate. *PeerJ* **5**, e3462. (doi:10.7717/peerj.3462)
- 442 33. Janson CH. 1990 Social correlates of individual spatial choice in foraging groups of brown capuchin  
443 monkeys, *Cebus apella*. *Anim. Behav.* **40**, 910–921. (doi:10.1016/S0003-3472(05)80993-5)
- 444 34. Overveld T van, García-Alfonso M, Dingemanse NJ, Bouten W, Gangoso L, Riva M de la, Serrano  
445 D, Donazar JA. 2018 Food predictability and social status drive individual resource specializations in  
446 a territorial vulture. *Sci. Rep.* **8**, 15155. (doi:10.1038/s41598-018-33564-y)
- 447 35. Choudhury S, Black JM. 1991 Testing the behavioural dominance and dispersal hypothesis in  
448 Pochard. *Ornis Scand. Scand. J. Ornithol.* **22**, 155–159. (doi:10.2307/3676546)
- 449 36. Milligan ND, Radersma R, Cole EF, Sheldon BC. 2017 To graze or gorge: consistency and flexibility  
450 of individual foraging tactics in tits. *J. Anim. Ecol.* **86**, 826–836. (doi:10.1111/1365-2656.12651)
- 451 37. Mady RP, Blumstein DT. 2017 Social security: are socially connected individuals less vigilant? *Anim.*  
452 *Behav.* **134**, 79–85. (doi:10.1016/j.anbehav.2017.10.010)
- 453 38. Lührs M-L, Dammhahn M, Kappeler P. 2013 Strength in numbers: males in a carnivore grow bigger  
454 when they associate and hunt cooperatively. *Behav. Ecol.* **24**, 21–28. (doi:10.1093/beheco/ars150)

- 455 39. Reader SM, Laland KN. 2000 Diffusion of foraging innovations in the guppy. *Anim. Behav.* **60**, 175–  
456 180. (doi:10.1006/anbe.2000.1450)
- 457 40. Smolla M, Rosher C, Gilman RT, Shultz S. 2019 Reproductive skew affects social information use. *R.*  
458 *Soc. Open Sci.* **6**, 182084. (doi:10.1098/rsos.182084)
- 459 41. Snijders L, Kurvers RHJM, Krause S, Ramnarine IW, Krause J. 2018 Individual- and population-level  
460 drivers of consistent foraging success across environments. *Nat. Ecol. Evol.* **2**, 1610–1618.  
461 (doi:10.1101/260604)
- 462 42. Barbosa M, Deacon AE, Janeiro MJ, Ramnarine I, Morrissey MB, Magurran AE. 2018 Individual  
463 variation in reproductive behaviour is linked to temporal heterogeneity in predation risk. *Proc. R. Soc.*  
464 *B* **285**, 20171499. (doi:10.1098/rspb.2017.1499)
- 465 43. Dimitriadou S, Croft DP, Darden SK. 2019 Divergence in social traits in Trinidadian guppies  
466 selectively bred for high and low leadership in a cooperative context. *Sci. Rep.* **9**, 1–12.  
467 (doi:10.1038/s41598-019-53748-4)
- 468 44. Griffiths SW, Magurran AE. 1998 Sex and schooling behaviour in the Trinidadian guppy. *Anim.*  
469 *Behav.* **56**, 689–693. (doi:10.1006/anbe.1998.0767)
- 470 45. Croft DP, Arrowsmith BJ, Bielby J, Skinner K, White E, Couzin ID, Magurran AE, Ramnarine I,  
471 Krause J. 2003 Mechanisms underlying shoal composition in the Trinidadian guppy, *Poecilia reticulata*.  
472 *Oikos* **100**, 429–438. (doi:10.1034/j.1600-0706.2003.12023.x)
- 473 46. Croft DP, Krause J, James R. 2004 Social networks in the guppy (*Poecilia reticulata*). *Proc. R. Soc. Lond. B*  
474 *Biol. Sci.* **271**, S516–S519. (doi:10.1098/rsbl.2004.0206)
- 475 47. Croft DP, James R, Thomas POR, Hathaway C, Mawdsley D, Laland KN, Krause J. 2006 Social  
476 structure and co-operative interactions in a wild population of guppies (*Poecilia reticulata*). *Behav. Ecol.*  
477 *Sociobiol.* **59**, 644–650. (doi:10.1007/s00265-005-0091-y)
- 478 48. Piyapong C, Krause J, Chapman BB, Ramnarine IW, Louca V, Croft DP. 2010 Sex matters: a social  
479 context to boldness in guppies (*Poecilia reticulata*). *Behav. Ecol.* **21**, 3–8. (doi:10.1093/beheco/arp142)
- 480 49. Harris S, Ramnarine IW, Smith HG, Pettersson LB. 2010 Picking personalities apart: estimating the  
481 influence of predation, sex and body size on boldness in the guppy *Poecilia reticulata*. *Oikos* **119**, 1711–  
482 1718. (doi:10.1111/j.1600-0706.2010.18028.x)
- 483 50. Magurran AE, Seghers BH. 1994 Sexual conflict as a consequence of ecology: evidence from guppy,  
484 *Poecilia reticulata*, populations in Trinidad. *Proc. R. Soc. B* **255**, 31–36. (doi:10.1098/rspb.1994.0005)
- 485 51. Deacon AE, Jones FAM, Magurran AE. 2018 Gradients in predation risk in a tropical river system.  
486 *Curr. Zool.* **64**, 213–221. (doi:10.1093/cz/zoy004)
- 487 52. Grether GF, Millie DF, Bryant MJ, Reznick DN, Mayea W. 2001 Rain forest canopy cover, resource  
488 availability, and life history evolution in guppies. *Ecology* **82**, 1546. (doi:10.2307/2679799)
- 489 53. Croft DP, Albanese B, Arrowsmith BJ, Botham M, Webster M, Krause J. 2003 Sex-biased movement  
490 in the guppy (*Poecilia reticulata*). *Oecologia* **137**, 62–68. (doi:10.1007/s00442-003-1268-6)
- 491 54. Grether GF, Kasahara S, Kolluru GR, Cooper EL. 2004 Sex-specific effects of carotenoid intake on  
492 the immunological response to allografts in guppies (*Poecilia reticulata*). *Proc. R. Soc. B* **271**, 45–49.  
493 (doi:10.1098/rspb.2003.2526)
- 494 55. Kodric-Brown A. 1989 Dietary carotenoids and male mating success in the guppy: an environmental  
495 component to female choice. *Behav. Ecol. Sociobiol.* **25**, 393–401. (doi:10.1007/BF00300185)

- 496 56. Friard O, Gamba M. 2016 BORIS: a free, versatile open-source event-logging software for  
497 video/audio coding and live observations. *Methods Ecol. Evol.* **7**, 1325–1330. (doi:10.1111/2041-  
498 210X.12584)
- 499 57. R Core Team. 2019 R: *A language and environment for statistical computing*. Vienna, Austria: R Foundation  
500 for Statistical Computing. See <https://www.R-project.org/>.
- 501 58. Bates D, Maechler M, Bolker B, Walker S. 2015 Fitting linear mixed-effects models using lme4. *J. Stat.*  
502 *Softw.* **67**, 1–48. (doi:10.18637/jss.v067.i01)
- 503 59. Therneau TM. 2020 *coxme: mixed effects cox models*. R package version 2.2-16. See [https://CRAN.R-](https://CRAN.R-project.org/package=coxme)  
504 [project.org/package=coxme](https://CRAN.R-project.org/package=coxme).
- 505 60. Therneau TM. 2015 *A package for survival analysis in S*. version 2.38. See [https://CRAN.R-](https://CRAN.R-project.org/package=survival)  
506 [project.org/package=survival](https://CRAN.R-project.org/package=survival).
- 507 61. Brooks M E, Kristensen K, van Benthem K J, Magnusson A, Berg C W, Nielsen A, Skaug H J,  
508 Mächler M, Bolker B M. 2017 glmmTMB balances speed and flexibility among packages for zero-  
509 inflated generalized linear mixed modeling. *R J.* **9**, 378–400. (doi:10.32614/RJ-2017-066)
- 510 62. Wickham H. 2016 *ggplot2: Elegant Graphics for Data Analysis*. New York, NY: Springer.
- 511 63. Hawkins ER, Pogson-Manning L, Jaehnichen C, Meager JJ. 2019 Social dynamics and sexual  
512 segregation of Australian humpback dolphins (*Sousa sabulensis*) in Moreton Bay, Queensland. *Mar.*  
513 *Mammal Sci.* **36**, 500-521. (doi:10.1111/mms.12657)
- 514 64. Simpson EA, Nicolini Y, Shetler M, Suomi SJ, Ferrari PF, Paukner A. 2016 Experience-independent  
515 sex differences in newborn macaques: Females are more social than males. *Sci. Rep.* **6**, 19669.  
516 (doi:10.1038/srep19669)
- 517 65. Reader SM, Lefebvre L. 2001 Social learning and sociality. *Behav. Brain Sci.* **24**, 353–355.  
518 (doi:10.1017/S0140525X01543964)
- 519 66. Wilkinson A, Kuenstner K, Mueller J, Huber L. 2010 Social learning in a non-social reptile (*Geochelone*  
520 *carbonaria*). *Biol. Lett.* **6**, 614–616. (doi:10.1098/rsbl.2010.0092)
- 521 67. Webster MM, Laland KN, Skelhorn J. 2017 Social information use and social learning in non-  
522 grouping fishes. *Behav. Ecol.* **28**, 1547–1552. (doi:10.1093/beheco/axx121)
- 523 68. Hester FJ. 1964 Effects of food supply on fecundity in the female guppy, *Lebistes reticulatus* (Peters). *J.*  
524 *Fish. Res. Board Can.* **21**, 757–764. (doi:10.1139/f64-068)
- 525 69. Magurran AE. 2005 *Evolutionary ecology: The Trinidadian guppy*. Oxford, UK: Oxford University Press.
- 526 70. Dammhahn M, Kappeler PM. 2009 Females go where the food is: does the socio-ecological model  
527 explain variation in social organisation of solitary foragers? *Behav. Ecol. Sociobiol.* **63**, 939.  
528 (doi:10.1007/s00265-009-0737-2)
- 529 71. Webster MM, Laland KN. 2013 Local enhancement via eavesdropping on courtship displays in male  
530 guppies, *Poecilia reticulata*. *Anim. Behav.* **86**, 75–83. (doi:10.1016/j.anbehav.2013.04.014)
- 531 72. Zajonc RB. 1965 Social facilitation. *Science* **149**, 269–274.
- 532 73. Crook JH, Gartlan JS. 1966 Evolution of primate societies. *Nature* **210**, 1200–1203.  
533 (doi:10.1038/2101200a0)

- 534 74. Emlen ST, Oring LW. 1977 Ecology, sexual selection, and the evolution of mating systems. *Science*  
535 **197**, 215–223. (doi:10.1126/science.327542)
- 536 75. Abrahams MV. 1993 The trade-off between foraging and courting in male guppies. *Anim. Behav.* **45**,  
537 673–681. (doi:10.1006/anbe.1993.1082)
- 538 76. Pitcher TJ, Magurran AE, Winfield IJ. 1982 Fish in larger shoals find food faster. *Behav. Ecol. Sociobiol.*  
539 **10**, 149–151. (doi:10.1007/BF00300175)
- 540 77. Pollard KA, Blumstein DT. 2008 Time allocation and the evolution of group size. *Anim. Behav.* **76**,  
541 1683–1699. (doi:10.1016/j.anbehav.2008.08.006)
- 542 78. Cresswell W, Quinn JL. 2011 Predicting the optimal prey group size from predator hunting  
543 behaviour. *J. Anim. Ecol.* **80**, 310–319. (doi:10.1111/j.1365-2656.2010.01775.x)
- 544 79. Botham MS, Kerfoot CJ, Louca V, Krause J. 2005 Predator choice in the field; grouping guppies,  
545 *Poecilia reticulata*, receive more attacks. *Behav. Ecol. Sociobiol.* **59**, 181. (doi:10.1007/s00265-005-0018-7)
- 546 80. Ward AJW, Herbert-Read JE, Sumpter DJT, Krause J. 2011 Fast and accurate decisions through  
547 collective vigilance in fish shoals. *Proc. Natl. Acad. Sci.* **108**, 2312–2315.  
548 (doi:10.1073/pnas.1007102108)
- 549
