1 **Causal evidence for the adaptive benefits of social foraging in the wild**

2 Lysanne Snijders<sup>1,2\*</sup>, Stefan Krause<sup>3</sup>, Alan N. Tump<sup>4</sup>, Michael Breuker<sup>3</sup>, Chente Ortiz<sup>5</sup>, Sofia Rizzi<sup>5</sup>, Indar  
3 W. Ramnarine<sup>6</sup>, Jens Krause<sup>1,5</sup>, Ralf H.J.M. Kurvers<sup>1,4</sup>

4

5 <sup>1</sup> Department of Biology and Ecology of Fishes, Leibniz Institute of Freshwater Ecology and Inland  
6 Fisheries, Berlin, Germany

7 <sup>2</sup> Behavioural Ecology Group, Wageningen University, Wageningen, The Netherlands

8 <sup>3</sup> Department of Electrical Engineering and Computer Science, Lübeck University of Applied Sciences,  
9 Lübeck, Germany

10 <sup>4</sup> Center for Adaptive Rationality, Max Planck Institute for Human Development, Berlin, Germany

11 <sup>5</sup> Faculty of Life Sciences, Humboldt Universität zu Berlin, Berlin, Germany

12 <sup>6</sup> Department of Life Sciences, University of the West Indies, St Augustine, Trinidad and Tobago

13 *\*Corresponding author*

14

15 **Keywords** group size, *Poecilia reticulata*, social evolution, social facilitation, social foraging, social  
16 information use

17 Sociality is a fundamental organizing principle across taxa, thought to come with a suite of  
18 adaptive benefits. However, making causal inferences about these adaptive benefits requires  
19 experimental manipulation of the social environment, which is rarely feasible in the field. Here  
20 we manipulated the number of conspecifics in Trinidadian guppies (*Poecilia reticulata*) in the  
21 wild, and quantified how this affected a key benefit of sociality, social foraging, by investigating  
22 several components of foraging success. As adaptive benefits of social foraging may differ  
23 between sexes, we studied males and females separately, expecting females, the more social and  
24 risk-averse sex, to benefit more from conspecifics than males. Conducting over 1,600 foraging  
25 trials, we found that in both sexes, increasing the number of conspecifics led to faster detection of  
26 novel food patches and a higher probability of feeding following detection of the patch, resulting  
27 in greater individual resource consumption. The slope of the latter relationship differed between  
28 the sexes, with males unexpectedly exhibiting a stronger social benefit. Our study provides rare  
29 causal evidence for the adaptive benefits of social foraging in the wild, and highlights that sex  
30 differences in sociality do not necessarily imply an unequal ability to profit from the presence of  
31 others.

32

33 Sociality evolved convergently in a wide range of taxa wherever its benefits (e.g. reduced predation risk  
34 and increased foraging success) outweighed its costs (e.g. increased conspicuousness and competition)  
35 [1,2]. This cost–benefit ratio of sociality is more variable in some animal populations than others, leading  
36 to a variety of social systems, from facultative social populations with a high degree of fission–fusion to  
37 obligate social populations with little fission–fusion [3]. Their socially plastic nature makes facultative  
38 social populations highly suitable study systems for investigating the costs and benefits of sociality—for  
39 example, by correlating natural variation in group size to variation in group performance [4], while  
40 including the performance of solitary individuals. However, studies examining natural variation in group  
41 size, although highly informative [5–8], do not allow causal conclusions to be drawn on the costs and  
42 benefits of sociality for individuals. Experimental studies have been designed to fill this gap by directly  
43 manipulating the social environment. As these studies have been conducted primarily in captive settings

44 [9–14], however, they are unable to incorporate all of the local environmental pressures that shaped  
45 selection for sociality.

46 Experimental studies that manipulate the number of conspecifics in the wild are few and far between.  
47 Such studies are vital for drawing ecologically and evolutionary relevant conclusions on the costs and  
48 benefits of social life. One key benefit of sociality is the opportunity for social foraging [15]. Although the  
49 exact benefits of the presence of conspecifics vary with ecological conditions [16,17] (e.g. food abundance  
50 [18]), the presence of conspecifics is generally thought to increase the mean (or reduce the variance in)  
51 individual foraging performance [15,19]. Due to the challenges of setting up, and subsequently replicating,  
52 different social compositions in the field, few studies have been able to experimentally manipulate the  
53 social environment in vertebrate species and study its effects on foraging performance in the wild [20–22].  
54 Fewer, if any, have been able to manipulate conspecific number, including representative solitary  
55 conditions.

56 Whether and how much an individual gains from the presence of conspecifics during foraging  
57 depends on individual- and group-level traits that modulate the effectiveness of the underlying social  
58 foraging mechanisms. Mechanisms that may underlie positive effects of sociality on individual foraging  
59 performance include local and stimulus enhancement [23], decreased neophobia [13], social facilitation  
60 [24], social and public information use [25], perceived safety (leading to e.g. a reduction in anti-predation  
61 behavior in favor of foraging [11]), perceived competition (leading to e.g. an increase in foraging effort to  
62 increase one's resource share [12]), pool of competence [7] and cooperation [5]. Mechanisms that may  
63 underlie negative effects of sociality include social attraction away from a profitable resource [26],  
64 misleading social information [27], increased interference [28] and exclusion from the resource [29].  
65 Identifying the exact mechanisms underlying social effects is challenging, especially in the wild. However,  
66 by studying how the number of conspecifics changes different components of foraging performance (e.g.  
67 resource detection and resource acquisition), and whether particular individual traits modulate these  
68 changes, we can gain more insight not only into whether social foraging has benefits, but also into the  
69 mechanisms underlying these benefits.

70 Sex is likely to be one of the prime individual-level traits influencing the potential benefit(s) of social  
71 foraging. Many individual-level characteristics that are predicted to modulate the effectiveness of social

72 foraging mechanisms, such as social position [30], risk-sensitivity [31], energy requirement [32] and  
73 dominance [33], covary with sex [18,31,34–39]. We may thus expect conspecific presence to have a  
74 stronger impact on foraging performance in one sex than the other [40,41].

75 Here, we conducted an in situ manipulation of the number of same-sex conspecifics in a facultative  
76 social vertebrate species, wild-living Trinidadian guppies (*Poecilia reticulata*). We varied the number of fish  
77 from one to eight males or females per pool. Subsequently, we conducted food-provisioning experiments  
78 and quantified different components of individual foraging performance, including (latency to) resource  
79 detection, likelihood of feeding following detection (i.e. resource acquisition) and total number of bites  
80 (i.e. resource consumption) in seven different natural pools. In our earlier work with wild Trinidadian  
81 guppies, living upstream in resource-poor environments, we revealed that more social individuals located  
82 more novel food patches [22,42]. We therefore predicted that increasing the number of conspecifics  
83 would positively influence individual resource detection. In contrast, due to the lack of predators [43] and  
84 the infrequent use of aggression [22] in our population, we did not expect a strong increase or decrease in  
85 resource acquisition with conspecific number. In addition, previous work showed that male guppies are  
86 generally less social [22,44–48] and more risk-taking than females [44,49–51]. We therefore predicted a  
87 shallower increase in foraging performance, in terms of both resource detection and acquisition, with  
88 increasing number of conspecifics for males than for females. Moreover, given females' higher nutritional  
89 demands, we expected females to show a stronger foraging performance overall. Finally, to evaluate  
90 whether the expected shallower increase in males' foraging performance could be explained by males  
91 generally taking less advantage of the presence of others, rather than by male conspecifics providing less  
92 effective social cues to other males, we also tested control compositions of one focal male with up to  
93 seven female conspecifics.

94

## 95 **Results**

### 96 **Resource detection: presence at novel food patches**

97 A larger number of fish in a pool, independent of sex, increased the chance and speed of a novel food  
98 patch being discovered by any fish (Supplementary Results), indicating the presence of advantageous  
99 social information that individuals could exploit to improve their foraging performance. Indeed, the

100 higher the number of conspecifics in the pool, the more likely individuals were to discover a novel patch  
101 (Estimate (*Est*)  $\pm$  Standard Error (*SE*) =  $0.22 \pm 0.07$ ,  $N = 5070$ ,  $\chi^2 = 10.27$ ,  $p = 0.001$ ; Figure 1). Males  
102 and females benefited similarly from the presence of more same-sex conspecifics (Interaction effect: *Est*  $\pm$   
103 *SE* =  $0.02 \pm 0.13$ ,  $N = 5070$ ,  $\chi^2 = 0.01$ ,  $p = 0.91$ ; Figure 1) and did not differ in their overall likelihood of  
104 finding a novel food patch (*Est*  $\pm$  *SE* =  $-0.11 \pm 0.14$ ,  $N = 5070$ ,  $\chi^2 = 0.61$ ,  $p = 0.43$ ; Figure 1). Body  
105 length did not affect the likelihood of novel food patch discovery (*Est*  $\pm$  *SE* =  $0.06 \pm 0.05$ ,  $N = 5070$ ,  $\chi^2$   
106 =  $1.73$ ,  $p = 0.19$ ) in either males or females (Interaction effect: *Est*  $\pm$  *SE* =  $-0.06 \pm 0.09$ ,  $N = 5070$ ,  $\chi^2 =$   
107  $0.36$ ,  $p = 0.55$ ). There was a (non-significant) tendency for the likelihood of novel food patch discovery to  
108 increase with trial number (*Est*  $\pm$  *SE* =  $0.06 \pm 0.03$ ,  $N = 5070$ ,  $\chi^2 = 2.77$ ,  $p = 0.096$ ). There was no effect  
109 of pool surface area (*Est*  $\pm$  *SE* =  $-0.02 \pm 0.13$ ,  $N = 5070$ ,  $\chi^2 = 0.02$ ,  $p = 0.88$ ).

110

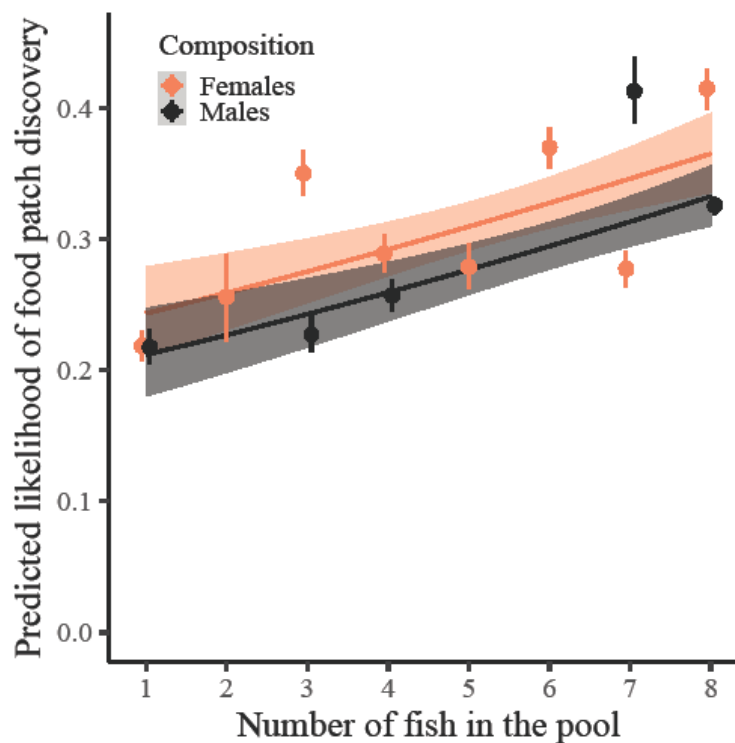

111

112 **Figure 1.** Predicted likelihood of novel food patch discovery per individual per trial as a function of the number of  
113 fish in the pool. Dots with bars represent the mean  $\pm$  95% confidence interval (*CI*) summary statistics for each sex  
114 and fish number (*CI* obtained from 1,000 bootstraps). Grouping of the data was conducted for graphical purposes  
115 only; analyses were conducted on an individual-by-trial level with the number of fish in the pool as a continuous

116 variable. Regression lines show the predicted final model values. Shaded areas around the lines reflect 95% *CI*. A  
117 slight horizontal position dodge was added to reduce overlap.

118

### 119 **Resource detection: arrival latency at novel food patches**

120 Individuals with more conspecifics in the pool were also quicker to reach a novel food patch (*Hazard ratio*  
121 (95% Confidence Interval (*CI*)) = 1.17 (1.06–1.30),  $N_{\text{not censored}}/N_{\text{total}} = 1423/4841$ ,  $\chi^2 = 9.78$ ,  $p = 0.002$ ;  
122 Figure 2) and this positive social effect was, again, similar for males and females (Interaction effect: *Hazard*  
123 *ratio* (*CI*) = 1.06 (0.87–1.30),  $N = 1423/4841$ ,  $\chi^2 = 0.36$ ,  $p = 0.55$ ; Figure 2). Males and females did also  
124 not differ in how quickly they overall reached a novel food patch (*Hazard ratio* (*CI*) = 0.88 (0.70–1.09),  $N$   
125 = 1423/4841,  $\chi^2 = 1.43$ ,  $p = 0.23$ ; Figure 2). Body length did not affect the speed of reaching a novel food  
126 patch (*Hazard ratio* (*CI*) = 1.04 (0.97–1.12),  $N = 1423/4841$ ,  $\chi^2 = 1.25$ ,  $p = 0.26$ ) in either males or females  
127 (Interaction effect: *Hazard ratio* (*CI*) = 0.91 (0.79–1.05),  $N = 1423/4841$ ,  $\chi^2 = 1.60$ ,  $p = 0.21$ ). Trial  
128 number did not affect how quickly an individual reached a novel food patch (*Hazard ratio* (*CI*) = 1.04  
129 (0.99–1.10),  $N = 1423/4841$ ,  $\chi^2 = 2.43$ ,  $p = 0.12$ ), neither did pool surface area (*Hazard ratio* (*CI*) = 0.94  
130 (0.76–1.16),  $N = 1423/4841$ ,  $\chi^2 = 0.36$ ,  $p = 0.55$ ). Also when looking at recruitment latency (defined as  
131 the time between the arrival of the first and second fish), we found no difference between males and  
132 females (Supplementary Results).

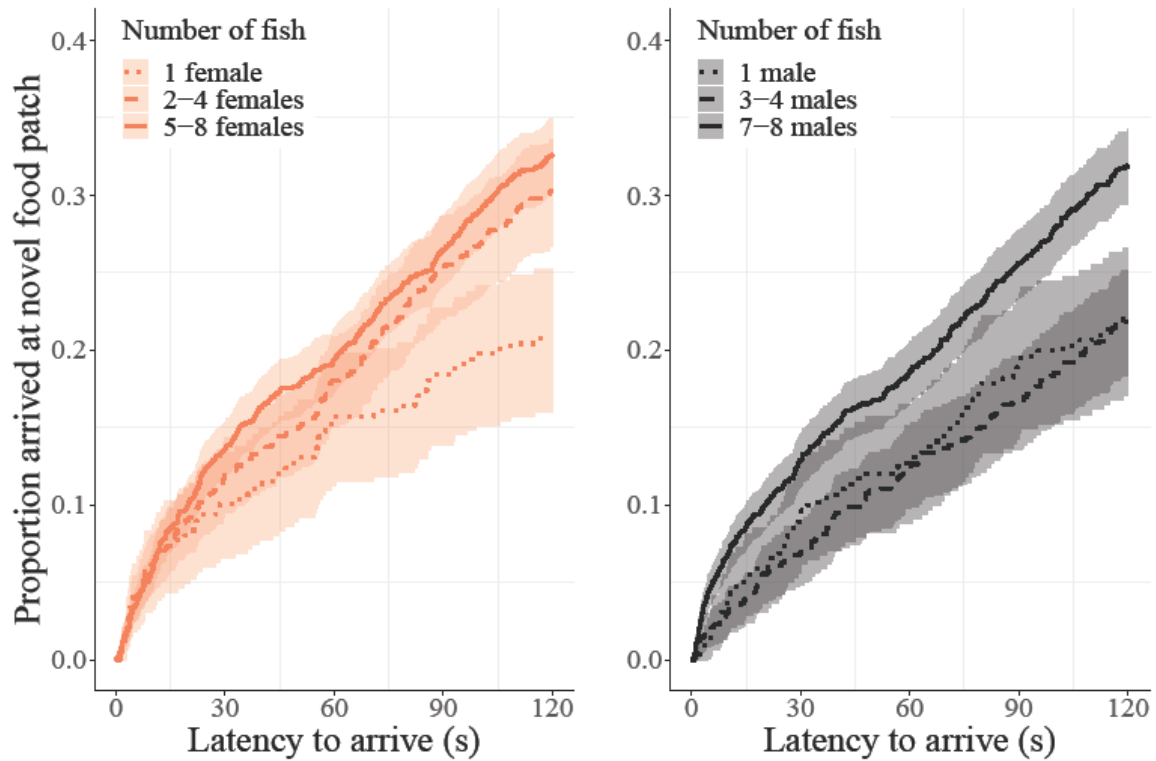

133  
134

135 **Figure 2.** Proportion of observations in which female and male individuals arrived at the novel food patch as a  
136 function of seconds since the start of the trial. Higher values on the y-axis reflect an increasing number of individuals  
137 arriving at a food patch by that time. Grouping of the number of fish in the pool was conducted for graphical  
138 purposes only; analyses were conducted with fish number as a continuous covariate. Regression lines show the  
139 predicted values of a simplified model (excluding additional co-variates and random effects). Shaded areas around  
140 the lines reflect 95% confidence intervals.

141

#### 142 **Resource acquisition: motivation to feed from novel food patches**

143 Individuals with more conspecifics in the pool were more likely to take a bite while present at a food  
144 patch, and this positive effect of conspecifics on the motivation to feed was stronger for males than for  
145 females (Interaction effect:  $Est \pm SE = 1.95 \pm 0.48$ ,  $N = 1423$ ,  $\chi^2 = 16.73$ ,  $p < 0.001$ ; Figure 3). Males  
146 were less likely than females to take a bite when they were solitary ( $Est \pm SE = -4.24 \pm 1.57$ ,  $N = 126$ ,  $\chi^2$   
147  $= 13.36$ ,  $p < 0.001$ ) but tended to be more likely than females to feed when they were with more than five  
148 fish in the pool ( $Est \pm SE = 1.68 \pm 0.92$ ,  $N = 966$ ,  $\chi^2 = 3.19$ ,  $p = 0.074$ ; Figure 3). Body length influenced  
149 whether an individual would feed, with a negative effect in males and a positive effect in females

150 (Interaction effect:  $Est \pm SE = -1.23 \pm 0.39$ ,  $N = 1423$ ,  $\chi^2 = 10.49$ ,  $p = 0.001$ ; Supplementary Figure 3).  
151 There was no effect of trial number on the likelihood of an individual taking a bite at a food patch ( $Est \pm$   
152  $SE = 0.06 \pm 0.09$ ,  $N = 1423$ ,  $\chi^2 = 0.45$ ,  $p = 0.50$ ), nor was there an effect of pool surface area ( $Est \pm SE$   
153  $= -0.09 \pm 0.46$ ,  $N = 1423$ ,  $\chi^2 = 0.04$ ,  $p = 0.84$ ).  
154

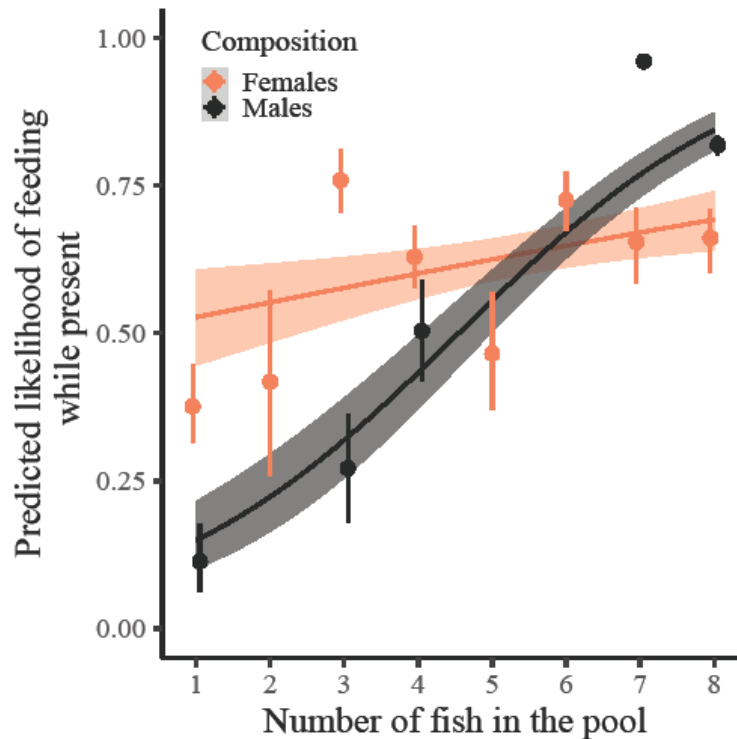

155  
156 **Figure 3.** Predicted probability of an individual feeding when at a food patch as a function of the number of fish in  
157 the pool. Dots with bars represent the mean  $\pm$  95% confidence interval (*CI*) summary statistics for each sex and fish  
158 number (*CI* obtained from 1,000 bootstraps). Grouping of the data was conducted for graphical purposes only;  
159 analyses were conducted on an individual-by-trial level with the number of fish in the pool as a continuous variable.  
160 Regression lines show the predicted final model values. Shaded areas around the lines reflect 95% *CI*. A slight  
161 horizontal position dodge was added to reduce overlap.

162

### 163 **Resource consumption: total number of bites**

164 Individuals with more conspecifics in the pool took more bites, with males showing a stronger increase  
165 with the number of conspecifics than females (Interaction effect:  $Est \pm SE = 1.07 \pm 0.29$ ,  $N = 265$ ,  $\chi^2 =$   
166  $13.35$ ,  $p < 0.001$ ; Figure 4). Solitary males took fewer bites than solitary females ( $Est \pm SE = -3.05 \pm$



167 1.15,  $N = 31$ ,  $\chi^2 = 14.39$ ,  $p < 0.001$ ; Figure 4), but males and females in a pool with at least four other  
168 conspecifics did not differ ( $Est \pm SE = 0.49 \pm 0.47$ ,  $N = 167$ ,  $\chi^2 = 1.11$ ,  $p = 0.29$ ; Figure 4). The number  
169 of bites decreased with body length in males, but increased with body length in females (Interaction effect:  
170  $Est \pm SE = -0.29 \pm 0.14$ ,  $N = 265$ ,  $\chi^2 = 4.32$ ,  $p = 0.04$ ; Supplementary Figure 4). Pool surface area had  
171 no effect on the total number of bites per individual ( $Est \pm SE = -0.02 \pm 0.24$ ,  $N = 265$ ,  $\chi^2 = 0.01$ ,  $p =$   
172 0.93).  
173

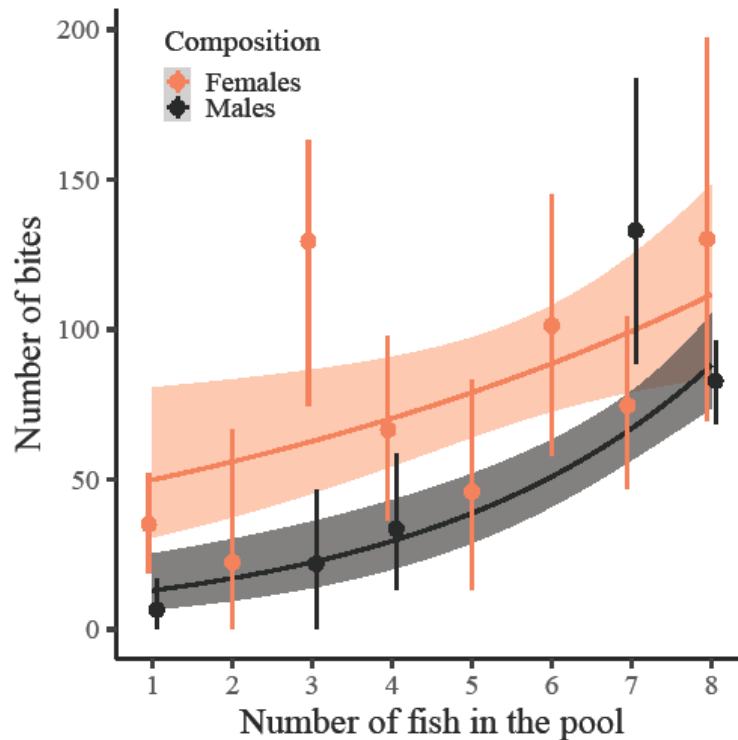

174  
175 **Figure 4.** Number of bites per individual as a function of the number of fish in the pool. Dots with bars represent  
176 the mean  $\pm$  95% confidence interval (*CI*) summary statistics for each sex and fish number (*CI* obtained from 1,000  
177 bootstraps). Grouping of the data was conducted for graphical purposes only; analyses were conducted on the level  
178 of individuals with the number of fish in the pool as a continuous variable. Regression lines show the predicted final  
179 model values. Shaded areas around the lines reflect 95% *CI*. A slight horizontal position dodge was added to reduce  
180 overlap.

181

182 **Foraging performance of males in the presence of females**

183 Consistent with our previous studies [22,42], there was a tendency for males with male conspecifics in the  
184 pool to be less likely to reach a novel food patch than males with female conspecifics (i.e. control  
185 compositions) ( $Est \pm SE = -0.60 \pm 0.35$ ,  $N = 1828$ ,  $\chi^2 = 2.79$ ,  $p = 0.09$ ; Supplementary Figure 5).  
186 However, sex of the conspecifics in the pool did not affect how quickly males reached a novel patch  
187 (*Hazard ratio (CI)* = 0.67 (0.40–1.13),  $N = 572/1713$ ,  $\chi^2 = 2.20$ ,  $p = 0.14$ ; Supplementary Figure 6). Males  
188 with male conspecifics in the pool were, in contrast, more likely to bite when present at a food patch than  
189 males with female conspecifics ( $Est \pm SE = 2.32 \pm 0.97$ ,  $N = 572$ ,  $\chi^2 = 5.02$ ,  $p = 0.02$ ; Supplementary  
190 Figure 7), resulting in a tendency for males with male conspecifics to also gain more bites in total ( $Est \pm$   
191  $SE = 0.78 \pm 0.44$ ,  $N = 97$ ,  $\chi^2 = 3.24$ ,  $p = 0.07$ ; Supplementary Figure 8).

192

## 193 Discussion

194 The costs and benefits of social living are a central research topic in ecology and evolution, yet few studies  
195 have been able to manipulate key modulators of this cost–benefit trade-off in the field. The present  
196 manipulation of conspecific presence in a facultatively social fish population provides causal evidence for  
197 an increase in resource detection (faster, more frequent), resource acquisition (more likely to feed) and  
198 total resource consumption (more bites) with an increasing number of conspecifics for both male and  
199 female guppies in the wild.

200 In many vertebrate species, there are strong sex differences in social tendencies and social interest  
201 [31,34,35,38,39,52] that may already be present from an early age [53]. Specifically, male guppies spend less  
202 time near same-sex conspecifics [22], are more likely to leave shoals [46] and are less likely to form stable  
203 cooperative bonds [45,48] than their female conspecifics. Our finding that males derived equal, if not  
204 greater, benefit than females from social foraging demonstrates that social foraging mechanisms are not  
205 necessarily less effective in classes of less social individuals (but see [40]), possibly because some of these  
206 social mechanisms are not an adaptation to social life per se [54]. Indeed, even non-social species, such as  
207 the solitary-living red-footed tortoise (*Geochelone carbonaria*), are capable of using social cues to their  
208 advantage [55]. Comparisons between grouping and non-grouping fish species have also found no  
209 differences in social information use [56]. We built upon these previous findings by showing that, also

210 within species, classes of less social individuals can use such social mechanisms equally well and, most  
211 importantly, that they use this capability to gain an advantage in a fitness-determining context in the wild.

212 We had expected females to show a stronger foraging performance overall, both in solitary and social  
213 conditions, being selected as such following the strong link between fecundity and resource availability in  
214 females [57–59], and given our earlier findings [22]. However, although females outperformed males in the  
215 solitary condition, males reached comparable levels of total resource consumption when at least six other  
216 same-sex conspecifics were present. Interference competition at the patch [28] may have partly  
217 constrained females to outperform males in highly social conditions. We can only speculate as to which  
218 mechanism(s) generated the strong positive social effect in males, but given that the increase in the  
219 number of bites appears to be driven mostly by an increase in the probability of feeding when present,  
220 mechanisms such as local enhancement [23], pool of competence [7] and cooperation [5] can be excluded.  
221 Perceived competition, which is predicted to increase feeding rate [12], is also an unlikely explanation as  
222 we would not expect it to change the motivation of fish that are not feeding at all. Perceived safety is also  
223 unlikely as a mechanism [11], as we would then have expected females (the risk-averse sex [44,49–51]) to  
224 show the strongest improvement in social versus asocial conditions. Alternatively, solitary males may have  
225 underperformed in resource acquisition because they were (also) looking for females, while males in the  
226 social condition may have used the presence of other males as an indicator that females should already be  
227 present [60]. Males in the company of several other foraging males may have been more motivated to  
228 linger and feed, making social facilitation [24,61] a likely mechanism of the observed increase in total  
229 resource consumption. This explanation is also in line with the socio-ecological theory that predicts that  
230 female distribution is governed primarily by the distribution of resources and risk, whereas male  
231 distribution is governed primarily by the (assumed) distribution of females [59,62,63].

232 To maximize their fitness, male animals have to ensure survival via sufficient resource consumption,  
233 while at the same time being prolific reproducers. Given that female presence is strongly linked to the  
234 presence of resources [59,62,63], males frequently have to choose between courting and foraging. An  
235 earlier study suggests that male Trinidadian guppies make state-dependent trade-offs in such situations,  
236 ensuring first that they have sufficient energy reserves, but then making a noticeable switch to courtship  
237 [64]. Indeed, although males tended to reach more novel food patches when in the presence of females,

238 consistent with our previous findings [22,42], they were less likely to feed than males in single-sex  
239 compositions, possibly because they were pursuing mating opportunities. Our results thus highlight the  
240 relevance not only of conspecific number, but also of sex-composition, for shaping individual foraging  
241 performance in the wild. Future studies could experimentally lower the energy reserves of individual males  
242 and examine whether the motivation to feed in mixed compositions approaches the level of that of males  
243 in single-sex compositions, so as to test whether the influence of composition on individual foraging  
244 performance is indeed mainly state-dependent.

245 The natural local environment that individuals inhabit modulates the cost–benefit ratio of sociality.  
246 Conducting experiments within the natural local environment of the study population, keeping natural  
247 selection pressures mostly intact, ensures that the findings will be maximally ecologically relevant. For  
248 example, when local food resources are limited, associating in larger shoals may speed up resource  
249 detection [65], which is especially beneficial in environments in which solitary detection of food resources  
250 is time consuming [66]. This benefit of sociality may be strengthened or outweighed by effects of local  
251 predation pressure, with increasing group size leading to less (e.g. “many-eyes” theory, dilution or  
252 confusion effect) or more (e.g. increased conspicuousness) individual-level predation risk [67–69]. Taking  
253 a comparative approach and conducting this experiment across populations inhabiting different  
254 environments [e.g. 50] would be an intriguing next step to identify the ecological preconditions that allow  
255 individuals to benefit from foraging socially—and hence make socially mediated foraging success a  
256 relevant contributor to the promotion of sociality.

257 In conclusion, we experimentally demonstrated the positive effect of conspecific presence on  
258 individual foraging performance in the wild. Moreover, by showing that both sexes were able to reach  
259 similar foraging performance levels when in the presence of others, we increased our understanding of the  
260 individual traits that may shape the evolution of sociality through effects on individual social foraging  
261 performance. Investigations into the individual states and ecological characteristics that modulate the  
262 individual costs and benefits of sociality in the wild offer fruitful avenues for future research.

263

## 264 **Methods**

### 265 **Study system**

266 We conducted the study between 4 and 20 March 2018 in the upper rainforest region of the Turure River  
267 in the Northern Range of Trinidad & Tobago (10°41'8"N, 61°10'22"W). This site has relatively few guppy  
268 predators [43,70] and is relatively resource poor due to low sunlight exposure [71]. We used seven natural  
269 pools in which we rearranged rocks and pebbles to maintain continuous water flow while minimizing the  
270 risk of fish migration. The average surface area of these pools was 3.3 m<sup>2</sup> (range: 2.4–4.6 m<sup>2</sup>;  
271 Supplementary Table 1); the average depth, based on five measurements in each pool, was 0.16 m (range  
272 0.12–0.26 m; Supplementary Table 1). Guppies originally occurring in the pools were taken out.  
273 Experimental fish were caught from a nearby stretch of the same river and were, upon capture, sexed (194  
274 females, 143 males), sized (females: Mean ± SD = 24.6 ± 3.7 mm, males: Mean ± SD = 21.6 ± 1.6 mm)  
275 and individually marked using Visible Implant Elastomer (VIE) tags (©Northwest Marine Technology  
276 Inc.)[22,47,72].

277

## 278 **Experimental treatments**

279 We assigned subjects to single-sex batches of one, four or eight fish (main treatments) or to a mixed-sex  
280 batch of one male and seven females (control treatment). Due to fish escaping (14% of 392 assigned  
281 individuals; with females being more likely to escape (41/235) than males (14/157):  $\chi^2 = 4.99$ ,  $P = 0.03$ ),  
282 we ultimately had a more diverse range of group sizes (females: one to eight fish; males: one, three, four,  
283 seven and eight fish; control: five to eight fish), spread over 84 batches (39 female batches, 35 male  
284 batches, 10 control batches; Supplementary Table 2). The different treatments were approximately  
285 balanced over the seven pools so that each pool received each of the seven treatments one to three times  
286 (Supplementary Table 1). Following marking, fish were placed in their designated pool and left overnight  
287 to acclimate. Foraging trials took place the next day. After finishing the foraging trials, we released  
288 subjects further downstream (to avoid recapture).

289

## 290 **Foraging trials**

291 Foraging trials were conducted following a protocol similar to [22,42]. We assigned five feeding locations,  
292 roughly equidistant from one another, in each pool, to offer novel food to the guppies. To standardize the  
293 food presentations, each location was marked by an opaque plastic cylinder (diameter: 77 mm, height: 30–

294 40 mm) floating on the surface and kept in place by two wooden skewers. Through these cylinders, we  
295 lowered a food item consisting of a small lead ball (diameter: 8 mm) covered in a mix of gelatine and fish  
296 food (TetraPro©; Spectrum Brands Inc), which was attached to a monofilament fishing line connected to  
297 a wooden rod. The fish food included carotenoids, an important dietary component for guppies [73,74].  
298 We kept the food item (termed ‘food patch’ from here on, as several fish could feed from it  
299 simultaneously) approximately two centimeters above the bottom of the pool for two minutes,  
300 irrespective of whether and when it was discovered. After each trial, we waited for one minute before  
301 starting a new trial in a different location. Once we had completed trials for all five locations of a pool in  
302 random order, we repeated this procedure three more times, resulting in 20 trials per batch, with some  
303 exceptions due to rain, leading to 1,645 trials in total.

304

### 305 **Video analyses**

306 We recorded all foraging trials with camcorders (SONY HDR-PJ530E), mounted on tripods. Two  
307 observers analyzed the recordings using BORIS v 7.5 [75], a free open-source event-logging software. The  
308 two observers analyzed different sets of trials, but both sets included all seven treatments and all seven  
309 pools. For each fish, the observer scored its presence, arrival latency and number of foraging bites. We  
310 defined a fish as present when it was within two body lengths of the food patch. To test the inter-observer  
311 reliability, we had both observers score the trials for the same set of six batches (30 unique individuals).  
312 The scores for arrival latency, total number of trials present and total number of foraging bites all  
313 correlated strongly between the two observers ( $r_i > 0.9$ ). For all trials, the food discovery latencies and  
314 presence/absence of individuals were also compared with field notes. In case of discrepancy, the video  
315 was checked again and, if necessary, scores were amended by a third observer who had also been present  
316 in the field. Not all videos could be reliably analyzed (e.g. due to glare). For 1,619 (out of 1,645) trials, we  
317 could reliably quantify whether or not each batch member had been present; for 1,559 trials, we could  
318 reliably assess arrival latency and foraging bites. These trials were used for subsequent analyses.

319

### 320 **Statistical analyses**

321 To investigate whether the number of conspecifics in the pool increased individual foraging performance  
322 (e.g. via social facilitation or social information use) and whether the strength of this effect was sex-  
323 dependent, we tested the effects of fish number (number of guppies in the pool), sex-composition (sex of  
324 the guppies in the pool: all-male or all-female, excluding control batches) and their interaction on four  
325 response variables: whether an individual found a patch (yes/no), for each trial (model I); the arrival  
326 latency of an individual, for each trial (model II); whether an individual took at least one bite from a patch  
327 (yes/no), for each patch visited (as a measure of motivation to feed; model III) and, finally, the total  
328 number of foraging bites per individual across all trials (model IV).

329 We used stepwise backward model selection, assessing the significance of fixed effects by the change  
330 in deviance upon removal of the effect, using log-likelihood ratio tests. Next to the interaction and main  
331 fixed effects of fish number (integer, scaled) and sex-composition (factor), all starting models included the  
332 main effect of pool surface area (continuous, scaled) and the main effects of body length in mm (integer,  
333 scaled and centered on sex) and its interaction with sex-composition. Batch identity and pool identity were  
334 included as random effects (Supplementary Figure 1). All models—except model IV—further included  
335 the fixed effect of trial number (integer, scaled) and the random effects of individual identity (nested in  
336 batch identity) and patch location identity (nested in pool identity; Supplementary Figure 2). Model IV  
337 uniquely included the number of trials conducted as a fixed effect (integer), which was kept in the model  
338 at all times to account for the slightly varying number of trials—and thus varying foraging opportunities—  
339 between individuals. Fish number and sex-composition were kept in the models at all times, irrespective  
340 of their significance, since they were our fixed effects of interest. Interactions and fixed effects with  $P >$   
341 0.1 were removed (unless stated differently above), starting with the least significant interaction followed  
342 by the least significant main effect. Estimates are reported for the last model still including the effect. In  
343 the case of a significant interaction between fish number and sex-composition, we additionally ran the  
344 respective model including only the singleton or the  $> 4$  fish treatments in order to specifically investigate  
345 potential sex differences in solitary versus social foraging performance.

346 Model selection was conducted with R version 4.0.2 [76] in R Studio version 1.2.5033 (© 2009–2019  
347 RStudio, Inc.). All the data and code generated and analyzed during the current study are available in the  
348 Open Science Framework repository [77]. Models I and III (binary dependent variable) were analyzed

349 with generalized linear mixed models (GLMM) with a binomial error distribution and logit link function  
350 using the `glmer` function from the ‘lme4’ package [78], fitted by maximum likelihood (Laplace  
351 approximation) using the `bobyqa` optimizer. Model II (continuous dependent variable) was analyzed with  
352 mixed effects repeated measures Cox proportional hazards models using the ‘coxme’ package [79], fitted  
353 by maximum likelihood. Trials in which individuals did not arrive at the food patch were assigned a  
354 latency of 120 seconds and labelled as right-censored (i.e. ‘120+’) using the `Surv` function in the ‘survival’  
355 package [80]. We evaluated the proportional hazards assumption by using the `cox.zph` function and  
356 graphically inspecting the survival curves. Hazard rates were calculated by `exp(coef)`. Finally, model IV  
357 (integer dependent variable), due to over-dispersion, was analyzed by running a GLMM using Template  
358 Model Builder (TMB) with a negative binomial error distribution and a log link function, using the  
359 `glmmTMB` function from the ‘glmmTMB’ package [81]. Individuals that were never present at any patch  
360 ( $N = 6$ ) were assigned zero bites.

361 To evaluate whether any observed sex difference in social foraging performance may have been  
362 driven by males having male foraging companions [22], rather than by males generally being poor or  
363 proficient social foragers, we compared the foraging performance of males in the company of other males  
364 to that of ‘control’ males in the company of females. We again used the statistical procedures described  
365 above, but excluding the interaction effects, female-only treatments and treatments with originally fewer  
366 than eight fish. All statistical tests are two-sided. Figures were created using the ‘ggplot2’ package [82].

367

368 **Ethics.** Subject were released on the day of the trials. We performed all research in accordance with the  
369 ‘Basic Principles Governing the Use of Live Animals and Endangered Species in Research at the  
370 University of the West Indies’ as part of the ‘Policy and Procedures on Research Ethics’ of the University  
371 of the West Indies Committee on Research Ethics.

372 **Data availability.** All the data and code generated and analyzed during the current study are available in  
373 the Open Science Framework repository, <https://osf.io/csajg>

374 **Authors’ contributions.** L.S., R.H.J.M., S.K. and J.K. designed the study. L.S., R.H.J.M., S.K., A.N.T.,  
375 M.B. and J.K. collected data, C.O. and S.R. extracted data from the videos, L.S. analysed the data; L.S.,



376 I.W.R., R.H.J.M.K. and J.K. contributed materials and infrastructure to the study; L.S. wrote the first draft  
377 of the manuscript; and all authors provided feedback to revisions.

378 **Conflict of interests.** We declare we have no competing interests.

379 **Funding.** The work was funded by an IGB Postdoc Fellowship (2017–2018) and a NWO-Veni  
380 Fellowship (2020–current; VI.Veni.192.018) to L.S.

381 **Acknowledgements.** We are very grateful to Sergio Garcia for helping us with the data collection and we  
382 are thankful to Susannah Goss for helpful comments on an earlier version of the manuscript.

## 383 References

- 384 1. Krause J, Ruxton GD. 2002 *Living in groups*. Oxford, UK: Oxford University Press.
- 385 2. Alexander RD. 1974 The evolution of social behavior. *Annu. Rev. Ecol. Evol. Syst.* **5**, 325–383.  
386 (doi:10.1146/annurev.es.05.110174.001545)
- 387 3. Aureli F *et al.* 2008 Fission–fusion dynamics: New research frameworks. *Curr. Anthropol.* **49**, 627–654.  
388 (doi:10.1086/586708)
- 389 4. Cantor M, Aplin LM, Farine DR. 2020 A primer on the relationship between group size and group  
390 performance. *Anim. Behav.* **166**, 139–146. (doi:10.1016/j.anbehav.2020.06.017)
- 391 5. MacNulty DR, Tallian A, Stahler DR, Smith DW. 2014 Influence of group size on the success of wolves  
392 hunting bison. *PLOS ONE* **9**, e112884. (doi:10.1371/journal.pone.0112884)
- 393 6. Ashton BJ, Thornton A, Ridley AR. 2019 Larger group sizes facilitate the emergence and spread of innovations  
394 in a group-living bird. *Anim. Behav.* **158**, 1–7. (doi:10.1016/j.anbehav.2019.10.004)
- 395 7. Morand-Ferron J, Quinn JL. 2011 Larger groups of passerines are more efficient problem solvers in the wild.  
396 *PNAS* **108**, 15898–15903. (doi:10.1073/pnas.1111560108)
- 397 8. Treherne JE, Foster WA. 1980 The effects of group size on predator avoidance in a marine insect. *Anim. Behav.*  
398 **28**, 1119–1122. (doi:10.1016/S0003-3472(80)80100-X)
- 399 9. Grand TC, Dill LM. 1999 The effect of group size on the foraging behaviour of juvenile coho salmon:  
400 Reduction of predation risk or increased competition? *Anim. Behav.* **58**, 443–451. (doi:10.1006/anbe.1999.1174)
- 401 10. Liker A, Bokony V. 2009 Larger groups are more successful in innovative problem solving in house sparrows.  
402 *PNAS* **106**, 7893–7898. (doi:10.1073/pnas.0900042106)
- 403 11. Blumstein DT, Evans CS, Daniel JC. 1999 An experimental study of behavioural group size effects in tammar  
404 wallabies, *Macropus eugenii*. *Anim. Behav.* **58**, 351–360. (doi:10.1006/anbe.1999.1156)
- 405 12. Rieucou G, Giraldeau L-A. 2009 Group size effect caused by food competition in nutmeg mannikins (*Lonchura*  
406 *punctulata*). *Behav. Ecol.* **20**, 421–425. (doi:10.1093/beheco/arm144)
- 407 13. Stöwe M, Bugnyar T, Heinrich B, Kotrschal K. 2006 Effects of group size on approach to novel objects in  
408 ravens (*Corvus corax*). *Ethology* **112**, 1079–1088. (doi:10.1111/j.1439-0310.2006.01273.x)
- 409 14. Steinegger M, Sarhan H, Bshary R. 2020 Laboratory experiments reveal effects of group size on hunting  
410 performance in yellow saddle goatfish, *Parupeneus cyclostomus*. *Anim. Behav.* **168**, 159–167.  
411 (doi:10.1016/j.anbehav.2020.08.018)
- 412 15. Giraldeau LA, Caraco T. 2000 *Social foraging theory*. Princeton, New Jersey, USA: Princeton University Press.
- 413 16. Monk CT, Barbier M, Romanczuk P, Watson JR, Alós J, Nakayama S, Rubenstein DI, Levin SA, Arlinghaus R.  
414 2018 How ecology shapes exploitation: a framework to predict the behavioural response of human and animal  
415 foragers along exploration–exploitation trade-offs. *Ecology* **21**, 779–793. (doi:10.1111/ele.12949)
- 416 17. Kendal RL, Coolen I, Bergen Y, Laland KN. 2005 Trade-offs in the adaptive use of social and asocial  
417 Learning. *Adv. Study Behav.* **35**, 333–379. (doi:10.1016/S0065-3454(05)35008-X)
- 418 18. Ellis S, Franks DW, Natrass S, Cant MA, Weiss MN, Giles D, Balcomb KC, Croft DP. 2017 Mortality risk and  
419 social network position in resident killer whales: Sex differences and the importance of resource abundance.  
420 *Proc. R. Soc. Lond. B* **284**, 20171313. (doi:10.1098/rspb.2017.1313)
- 421 19. Caraco T. 1981 Risk-sensitivity and foraging groups. *Ecology* **62**, 527–531. (doi:10.2307/1937716)

- 422 20. Firth JA, Voelkl B, Farine DR, Sheldon BC. 2015 Experimental evidence that social relationships determine  
423 individual foraging behavior. *Curr. Biol.* **25**, 3138–3143. (doi:10.1016/j.cub.2015.09.075)
- 424 21. Magurran AE, Seghers BH. 1994 A cost of sexual harassment in the guppy, *Poecilia reticulata*. *Proc. R. Soc. Lond. B*  
425 **258**, 89–92. (doi:10.1098/rspb.1994.0147)
- 426 22. Snijders L, Kurvers RHJM, Krause S, Tump AN, Ramnarine IW, Krause J. 2019 Females facilitate male food  
427 patch discovery in a wild fish population. *J. Anim. Ecol.* **88**, 1950–1960. (doi:10.1111/1365-2656.13086)
- 428 23. Avarguès-Weber A, Chittka L. 2014 Local enhancement or stimulus enhancement? Bumblebee social learning  
429 results in a specific pattern of flower preference. *Anim. Behav.* **97**, 185–191. (doi:10.1016/j.anbehav.2014.09.020)
- 430 24. Dindo M, Whiten A, Waal FBM de. 2009 Social facilitation of exploratory foraging behavior in capuchin  
431 monkeys (*Cebus apella*). *Am. J. Primatol.* **71**, 419–426. (doi:10.1002/ajp.20669)
- 432 25. Webster MM, Laland KN. 2012 Social information, conformity and the opportunity costs paid by foraging fish.  
433 *Behav. Ecol. Sociobiol.* **66**, 797–809. (doi:10.1007/s00265-012-1328-1)
- 434 26. Trompf L, Brown C. 2014 Personality affects learning and trade-offs between private and social information in  
435 guppies, *Poecilia reticulata*. *Anim. Behav.* **88**, 99–106. (doi:10.1016/j.anbehav.2013.11.022)
- 436 27. Rieucou G, Giraldeau L-A. 2009 Persuasive companions can be wrong: the use of misleading social information  
437 in nutmeg mannikins. *Behav. Ecol.* **20**, 1217–1222. (doi:10.1093/beheco/arp121)
- 438 28. Focardi S, Pecchioli E. 2005 Social cohesion and foraging decrease with group size in fallow deer (*Dama dama*).  
439 *Behav. Ecol. Sociobiol.* **59**, 84–91. (doi:10.1007/s00265-005-0012-0)
- 440 29. Smith JE, Kolowski JM, Graham KE, Dawes SE, Holekamp KE. 2008 Social and ecological determinants of  
441 fission–fusion dynamics in the spotted hyaena. *Anim. Behav.* **76**, 619–636. (doi:10.1016/j.anbehav.2008.05.001)
- 442 30. Aplin LM, Farine DR, Morand-Ferron J, Sheldon BC. 2012 Social networks predict patch discovery in a wild  
443 population of songbirds. *Proc. R. Soc. Lond. B* **279**, 4199–4205. (doi:10.1098/rspb.2012.1591)
- 444 31. Webster MM, Laland KN. 2011 Reproductive state affects reliance on public information in sticklebacks. *Proc.*  
445 *R. Soc. Lond. B* **278**, 619–627. (doi:10.1098/rspb.2010.1562)
- 446 32. Rands SA, Pettifor RA, Rowcliffe JM, Cowlshaw G. 2004 State-dependent foraging rules for social animals in  
447 selfish herds. *Proc. R. Soc. Lond. B* **271**, 2613–2620. (doi:10.1098/rspb.2004.2906)
- 448 33. Lee AEG, Cowlshaw G. 2017 Switching spatial scale reveals dominance-dependent social foraging tactics in a  
449 wild primate. *PeerJ* **5**, e3462. (doi:10.7717/peerj.3462)
- 450 34. Janson CH. 1990 Social correlates of individual spatial choice in foraging groups of brown capuchin monkeys,  
451 *Cebus apella*. *Anim. Behav.* **40**, 910–921. (doi:10.1016/S0003-3472(05)80993-5)
- 452 35. Overveld T, García-Alfonso M, Dingemanse NJ, Bouten W, Gangoso L, Riva M, Serrano D, Donázar JA. 2018  
453 Food predictability and social status drive individual resource specializations in a territorial vulture. *Sci. Rep.* **8**,  
454 15155. (doi:10.1038/s41598-018-33564-y)
- 455 36. Choudhury S, Black JM. 1991 Testing the behavioural dominance and dispersal hypothesis in Pochard. *Ornis*  
456 *Scand.* **22**, 155–159. (doi:10.2307/3676546)
- 457 37. Milligan ND, Radersma R, Cole EF, Sheldon BC. 2017 To graze or gorge: consistency and flexibility of  
458 individual foraging tactics in tits. *J. Anim. Ecol.* **86**, 826–836. (doi:10.1111/1365-2656.12651)
- 459 38. Mady RP, Blumstein DT. 2017 Social security: are socially connected individuals less vigilant? *Anim. Behav.* **134**,  
460 79–85. (doi:10.1016/j.anbehav.2017.10.010)
- 461 39. Lührs M-L, Dammhahn M, Kappeler P. 2013 Strength in numbers: males in a carnivore grow bigger when they  
462 associate and hunt cooperatively. *Behav. Ecol.* **24**, 21–28. (doi:10.1093/beheco/ars150)

- 463 40. Reader SM, Laland KN. 2000 Diffusion of foraging innovations in the guppy. *Anim. Behav.* **60**, 175–180.  
464 (doi:10.1006/anbe.2000.1450)
- 465 41. Smolla M, Rosher C, Gilman RT, Shultz S. 2019 Reproductive skew affects social information use. *R. Soc. Open*  
466 *Sci.* **6**, 182084. (doi:10.1098/rsos.182084)
- 467 42. Snijders L, Kurvers RHJM, Krause S, Ramnarine IW, Krause J. 2018 Individual- and population-level drivers of  
468 consistent foraging success across environments. *Nat. Ecol. Evol.* **2**, 1610–1618. (doi:10.1101/260604)
- 469 43. Barbosa M, Deacon AE, Janeiro MJ, Ramnarine I, Morrissey MB, Magurran AE. 2018 Individual variation in  
470 reproductive behaviour is linked to temporal heterogeneity in predation risk. *Proc. R. Soc. Lond. B* **285**, 20171499.  
471 (doi:10.1098/rspb.2017.1499)
- 472 44. Dimitriadou S, Croft DP, Darden SK. 2019 Divergence in social traits in Trinidadian guppies selectively bred  
473 for high and low leadership in a cooperative context. *Sci. Rep.* **9**, 1–12. (doi:10.1038/s41598-019-53748-4)
- 474 45. Griffiths SW, Magurran AE. 1998 Sex and schooling behaviour in the Trinidadian guppy. *Anim. Behav.* **56**, 689–  
475 693. (doi:10.1006/anbe.1998.0767)
- 476 46. Croft DP, Arrowsmith BJ, Bielby J, Skinner K, White E, Couzin ID, Magurran AE, Ramnarine I, Krause J.  
477 2003 Mechanisms underlying shoal composition in the Trinidadian guppy, *Poecilia reticulata*. *Oikos* **100**, 429–438.  
478 (doi:10.1034/j.1600-0706.2003.12023.x)
- 479 47. Croft DP, Krause J, James R. 2004 Social networks in the guppy (*Poecilia reticulata*). *Proc. R. Soc. Lond. B* **271**,  
480 S516–S519. (doi:10.1098/rsbl.2004.0206)
- 481 48. Croft DP, James R, Thomas POR, Hathaway C, Mawdsley D, Laland KN, Krause J. 2006 Social structure and  
482 co-operative interactions in a wild population of guppies (*Poecilia reticulata*). *Behav. Ecol. Sociobiol.* **59**, 644–650.  
483 (doi:10.1007/s00265-005-0091-y)
- 484 49. Piyapong C, Krause J, Chapman BB, Ramnarine IW, Louca V, Croft DP. 2010 Sex matters: A social context to  
485 boldness in guppies (*Poecilia reticulata*). *Behav. Ecol.* **21**, 3–8. (doi:10.1093/beheco/arp142)
- 486 50. Harris S, Ramnarine IW, Smith HG, Petterson LB. 2010 Picking personalities apart: estimating the influence of  
487 predation, sex and body size on boldness in the guppy *Poecilia reticulata*. *Oikos* **119**, 1711–1718.  
488 (doi:10.1111/j.1600-0706.2010.18028.x)
- 489 51. Magurran AE, Seghers BH. 1994 Sexual conflict as a consequence of ecology: Evidence from guppy, *Poecilia*  
490 *reticulata*, populations in Trinidad. *Proc. R. Soc. Lond. B* **255**, 31–36. (doi:10.1098/rspb.1994.0005)
- 491 52. Hawkins ER, Pogson Manning L, Jaehnichen C, Meager JJ. 2020 Social dynamics and sexual segregation of  
492 Australian humpback dolphins (*Sousa sabulensis*) in Moreton Bay, Queensland. *Mar. Mamm. Sci.* **36**, 500–521.  
493 (doi:10.1111/mms.12657)
- 494 53. Simpson EA, Nicolini Y, Shetler M, Suomi SJ, Ferrari PF, Paukner A. 2016 Experience-independent sex  
495 differences in newborn macaques: Females are more social than males. *Sci. Rep.* **6**, 19669.  
496 (doi:10.1038/srep19669)
- 497 54. Reader SM, Lefebvre L. 2001 Social learning and sociality. *Behav. Brain Sci.* **24**, 353–355.
- 498 55. Wilkinson A, Kuenstner K, Mueller J, Huber L. 2010 Social learning in a non-social reptile (*Geochelone carbonaria*).  
499 *Biol. Lett.* **6**, 614–616. (doi:10.1098/rsbl.2010.0092)
- 500 56. Webster MM, Laland KN, Skelhorn J. 2017 Social information use and social learning in non-grouping fishes.  
501 *Behav. Ecol.* **28**, 1547–1552. (doi:10.1093/beheco/axx121)
- 502 57. Hester FJ. 1964 Effects of food supply on fecundity in the female guppy, *Lebistes reticulatus* (Peters). *J. Fish. Res.*  
503 *Bd. Can.* **21**, 757–764. (doi:10.1139/f64-068)
- 504 58. Magurran AE. 2005 *Evolutionary ecology: The Trinidadian guppy*. Oxford, UK: Oxford University Press.

- 505 59. Dammhahn M, Kappeler PM. 2009 Females go where the food is: does the socio-ecological model explain  
506 variation in social organisation of solitary foragers? *Behav. Ecol. Sociobiol.* **63**, 939. (doi:10.1007/s00265-009-0737-  
507 2)
- 508 60. Webster MM, Laland KN. 2013 Local enhancement via eavesdropping on courtship displays in male guppies,  
509 *Poecilia reticulata*. *Anim. Behav.* **86**, 75–83. (doi:10.1016/j.anbehav.2013.04.014)
- 510 61. Zajonc RB. 1965 Social facilitation. *Science* **149**, 269–274.
- 511 62. Crook JH, Gartlan JS. 1966 Evolution of primate societies. *Nature* **210**, 1200–1203. (doi:10.1038/2101200a0)
- 512 63. Emlen ST, Oring LW. 1977 Ecology, sexual selection, and the evolution of mating systems. *Science* **197**, 215–  
513 223.
- 514 64. Abrahams MV. 1993 The trade-off between foraging and courting in male guppies. *Anim. Behav.* **45**, 673–681.  
515 (doi:10.1006/anbe.1993.1082)
- 516 65. Pitcher TJ, Magurran AE, Winfield IJ. 1982 Fish in larger shoals find food faster. *Behav. Ecol. Sociobiol.* **10**, 149–  
517 151. (doi:10.1007/BF00300175)
- 518 66. Pollard KA, Blumstein DT. 2008 Time allocation and the evolution of group size. *Anim. Behav.* **76**, 1683–1699.  
519 (doi:10.1016/j.anbehav.2008.08.006)
- 520 67. Cresswell W, Quinn JL. 2011 Predicting the optimal prey group size from predator hunting behaviour. *J. Anim.*  
521 *Ecol.* **80**, 310–319. (doi:10.1111/j.1365-2656.2010.01775.x)
- 522 68. Botham MS, Kerfoot CJ, Louca V, Krause J. 2005 Predator choice in the field: grouping guppies, *Poecilia*  
523 *reticulata*, receive more attacks. *Behav. Ecol. Sociobiol.* **59**, 181. (doi:10.1007/s00265-005-0018-7)
- 524 69. Ward AJW, Herbert-Read JE, Sumpter DJT, Krause J. 2011 Fast and accurate decisions through collective  
525 vigilance in fish shoals. *PNAS* **108**, 2312–2315. (doi:10.1073/pnas.1007102108)
- 526 70. Deacon AE, Jones FAM, Magurran AE. 2018 Gradients in predation risk in a tropical river system. *Curr. Zool.*  
527 **64**, 213–221. (doi:10.1093/cz/zoy004)
- 528 71. Grether GF, Millie DF, Bryant MJ, Reznick DN, Mayea W. 2001 Rain forest canopy cover, resource availability,  
529 and life history evolution in guppies. *Ecology* **82**, 1546. (doi:10.2307/2679799)
- 530 72. Croft DP, Albanese B, Arrowsmith BJ, Botham M, Webster M, Krause J. 2003 Sex-biased movement in the  
531 guppy (*Poecilia reticulata*). *Oecologia* **137**, 62–68. (doi:10.1007/s00442-003-1268-6)
- 532 73. Grether GF, Kasahara S, Kolluru GR, Cooper EL. 2004 Sex-specific effects of carotenoid intake on the  
533 immunological response to allografts in guppies (*Poecilia reticulata*). *Proc. R. Soc. Lond. B* **271**, 45–49.  
534 (doi:10.1098/rspb.2003.2526)
- 535 74. Kodric-Brown A. 1989 Dietary carotenoids and male mating success in the guppy: An environmental  
536 component to female choice. *Behav. Ecol. Sociobiol.* **25**, 393–401. (doi:10.1007/BF00300185)
- 537 75. Friard O, Gamba M. 2016 BORIS: a free, versatile open-source event-logging software for video/audio coding  
538 and live observations. *Methods Ecol. Evol.* **7**, 1325–1330. (doi:10.1111/2041-210X.12584)
- 539 76. R Core Team. 2020 *R: A Language and environment for statistical computing*. Vienna, Austria: R Foundation for  
540 Statistical Computing. See <https://www.R-project.org/>.
- 541 77. Snijders L, Krause S, Tump AN, Breuker M, Ortiz C, Rizzi S, Ramnarine IW, Krause J, Kurvers RHJM. 2020  
542 Data from: Causal evidence for the adaptive benefits of social foraging in the wild. *OSF*
- 543 78. Bates D, Maechler M, Bolker B, Walker S. 2015 Fitting linear mixed-effects models using lme4. *J. Stat. Softw.* **67**,  
544 1–48. (doi:10.18637/jss.v067.i01)

- 545 79. Therneau TM. 2020 *coxme: Mixed Effects Cox Models*. R package version 2.2-16. See [https://CRAN.R-](https://CRAN.R-project.org/package=coxme)  
546 [project.org/package=coxme](https://CRAN.R-project.org/package=coxme).
- 547 80. Therneau TM. 2015 *\_A Package for Survival Analysis in S\_*. version 2.38. See [https://CRAN.R-](https://CRAN.R-project.org/package=survival)  
548 [project.org/package=survival](https://CRAN.R-project.org/package=survival).
- 549 81. Brooks M, Kristensen K, Benthem K, Magnusson A, Berg C, Nielsen A, Skaug H, Mächler M, Bolker B. 2017  
550 glmmTMB balances speed and flexibility among packages for zero-inflated Generalized Linear Mixed Modeling.  
551 *R. J.* **9**, 378. (doi:10.32614/RJ-2017-066)
- 552 82. Wickham H. 2016 *ggplot2: Elegant graphics for data analysis*. New York: Springer-Verlag.
- 553
